# Supplementary material
Source: MDPI journal article supplement (https://www.mdpi.com/1999-4907/8/6/179)

Table S1: Monthly Fuel Moisture Scenarios

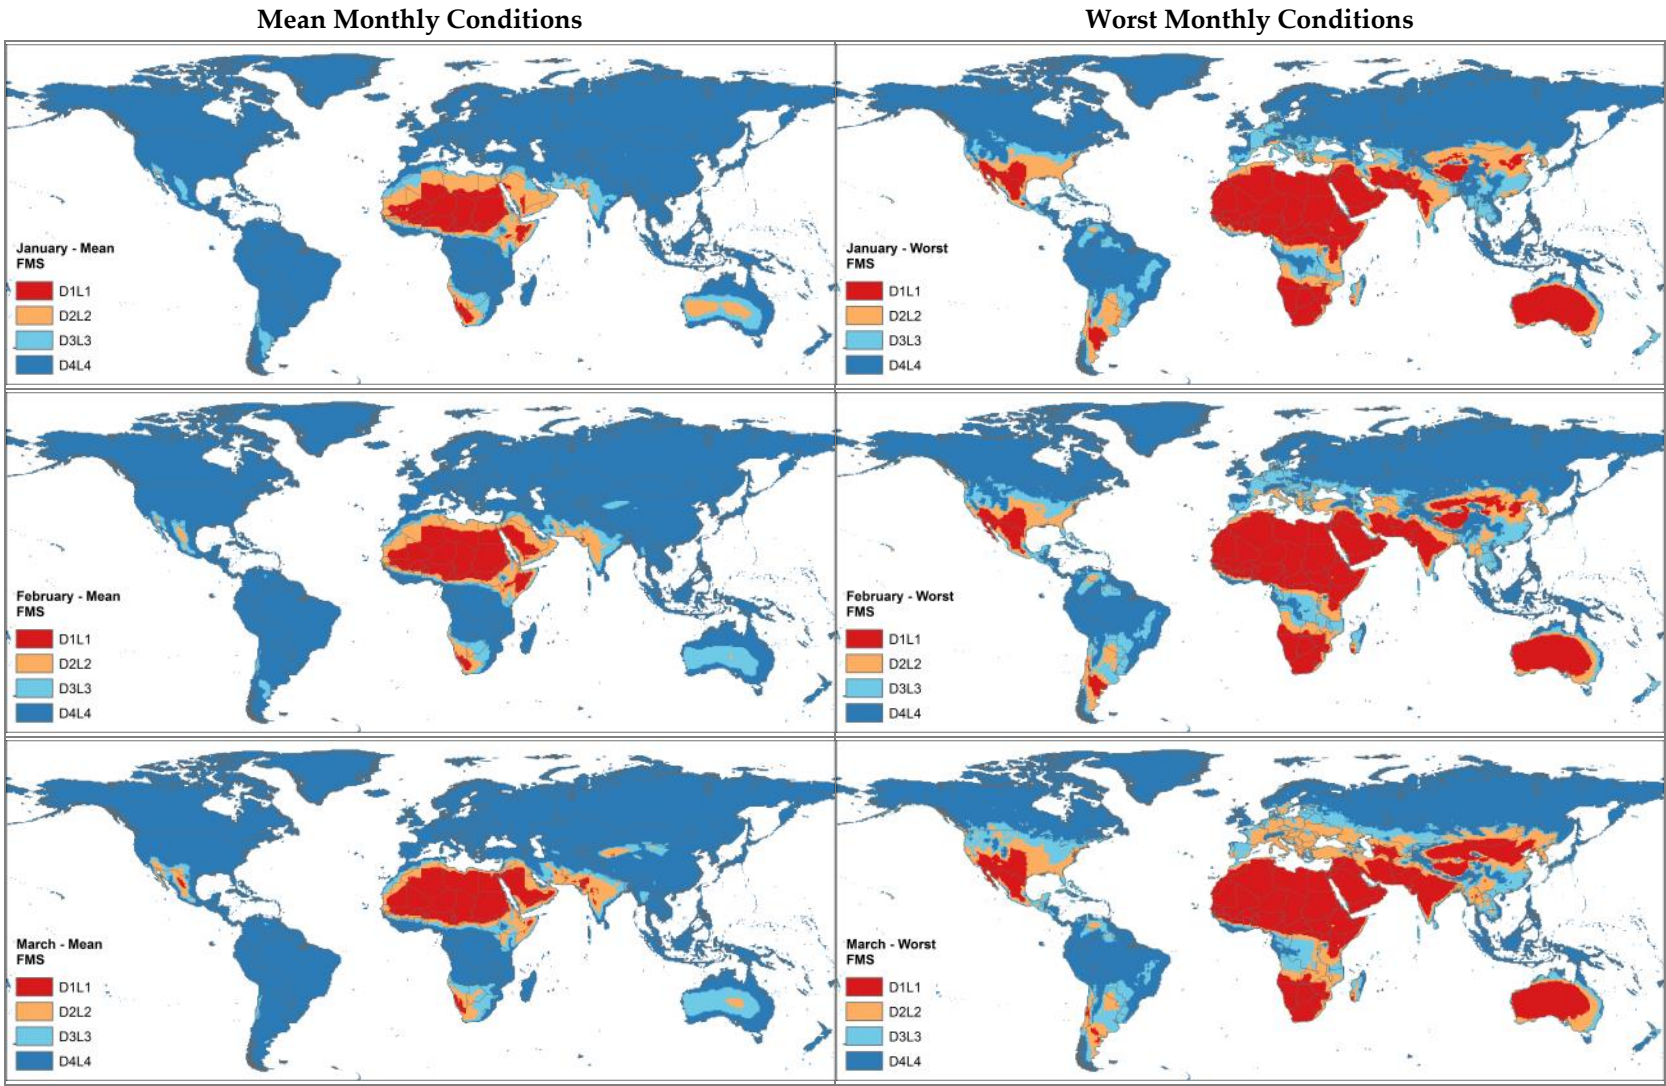

Table S1: Monthly Fuel Moisture Scenarios

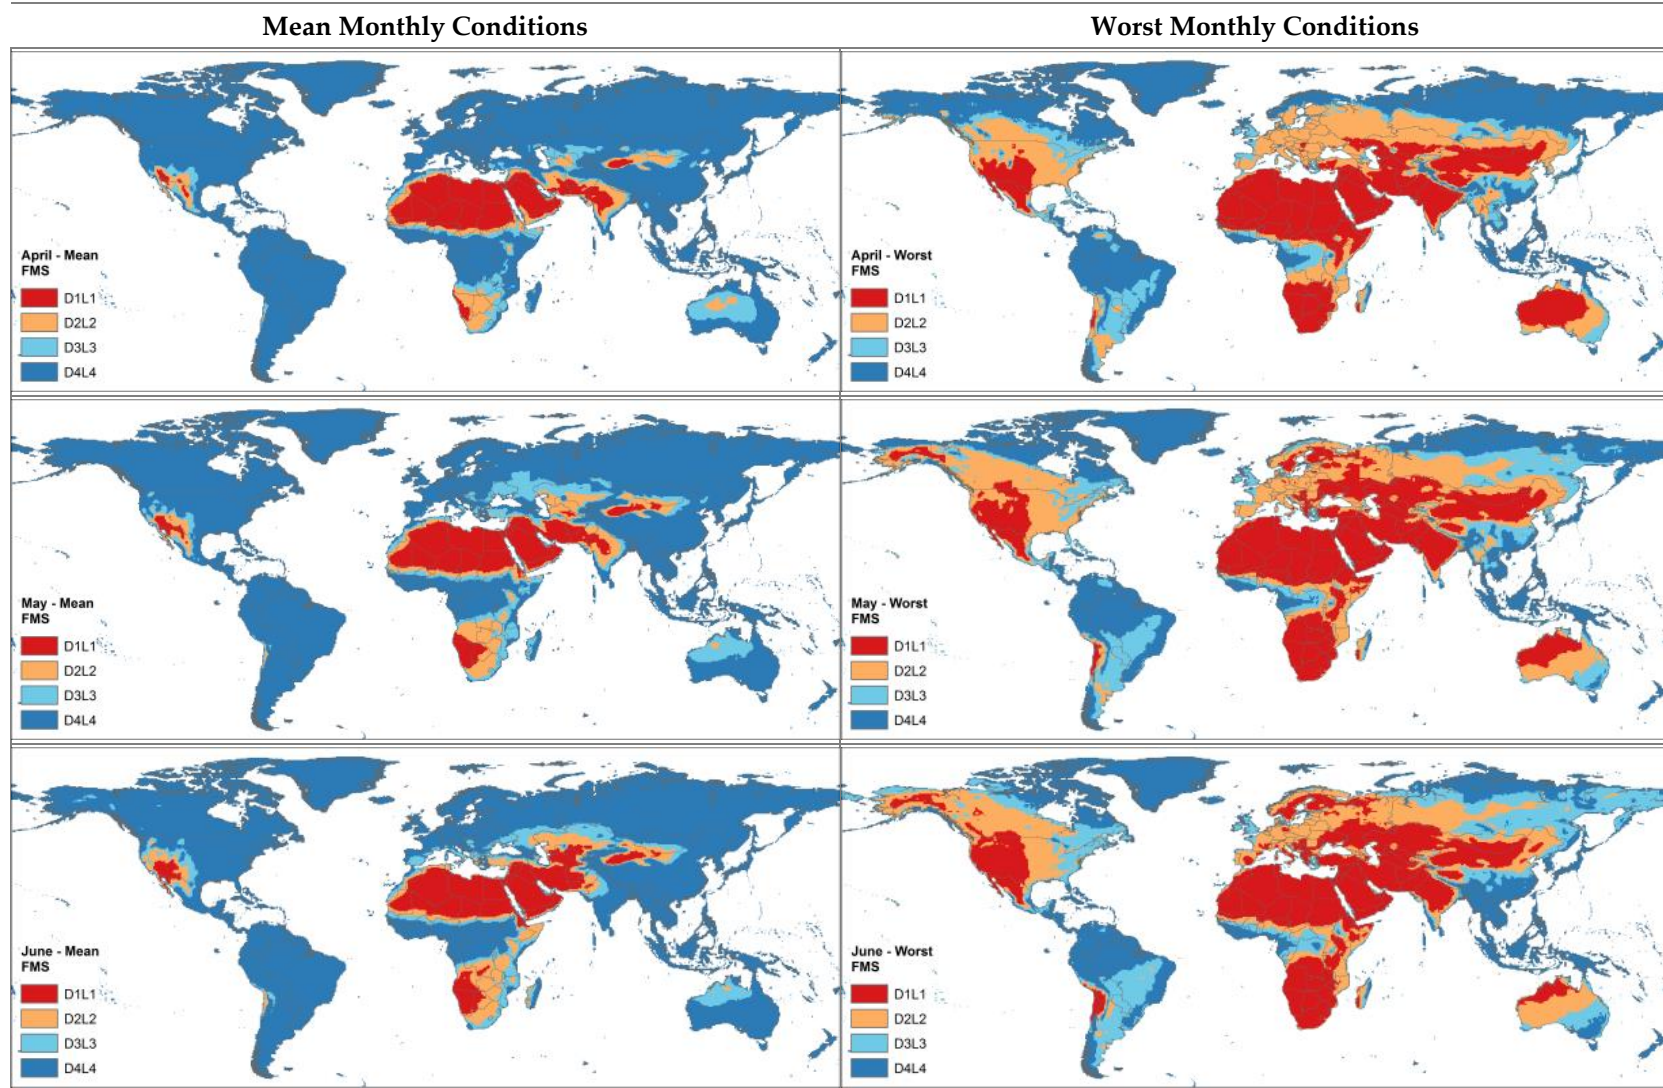



Table S1: Monthly Fuel Moisture Scenarios

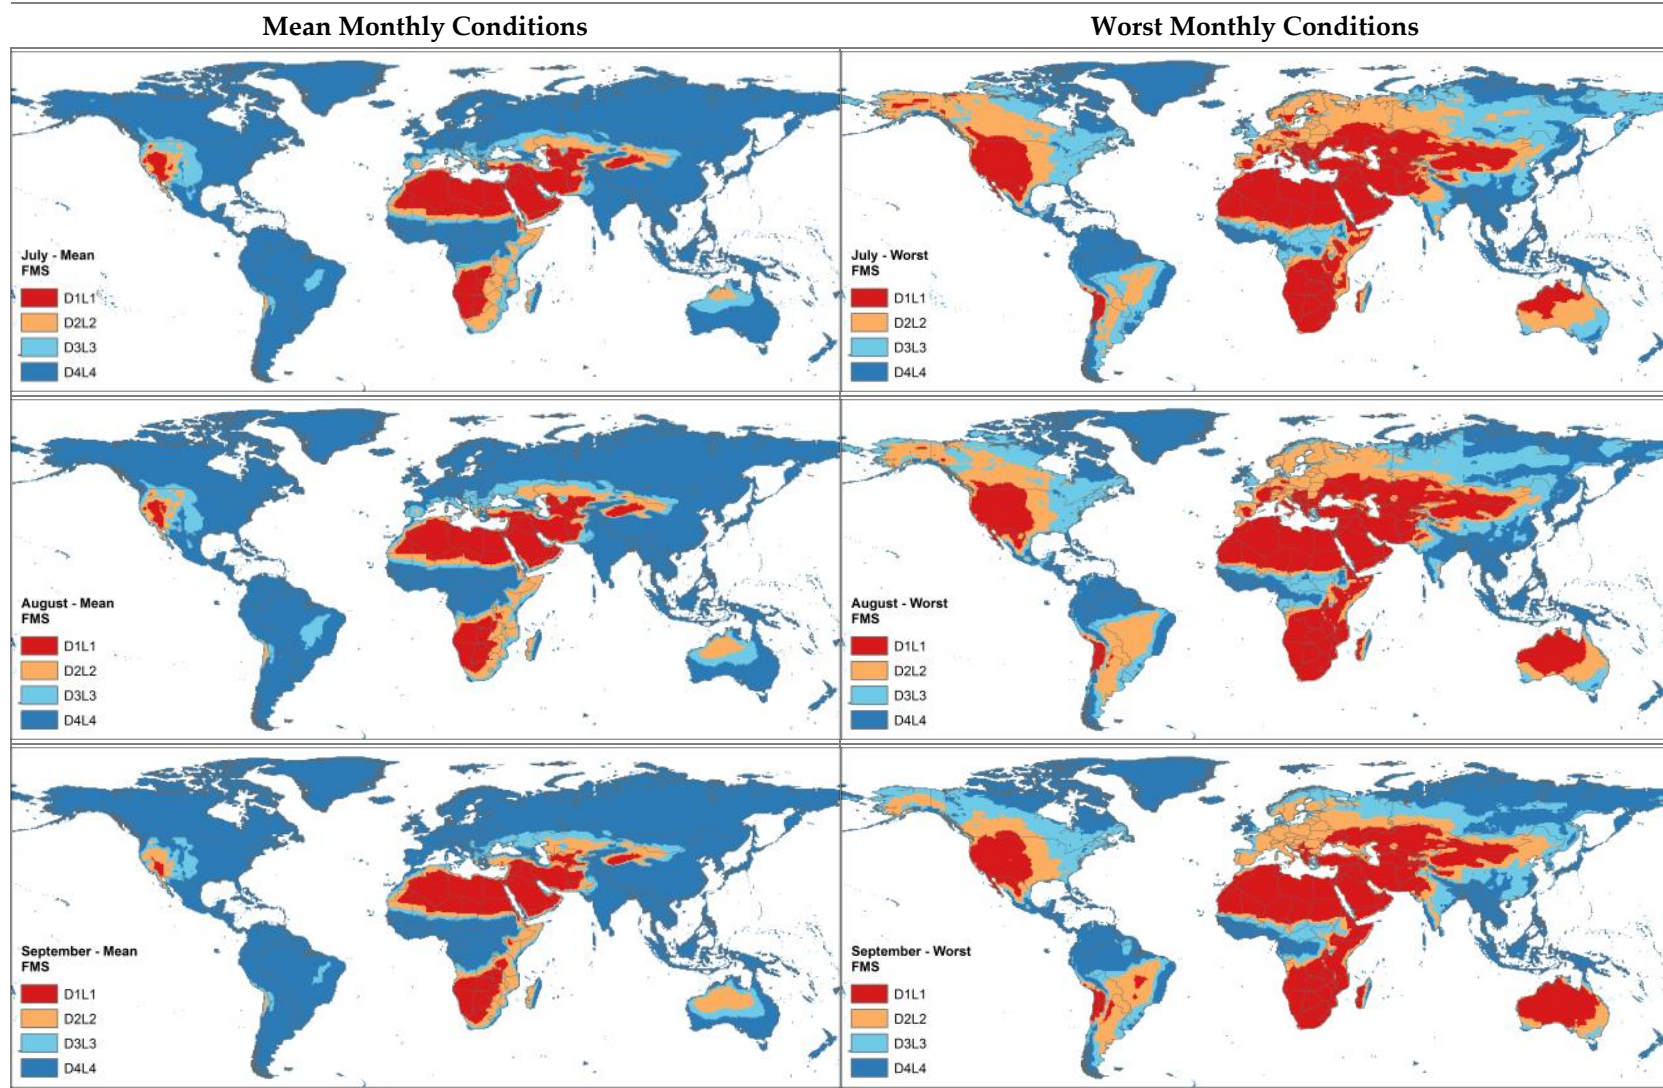

Table S1: Monthly Fuel Moisture Scenarios

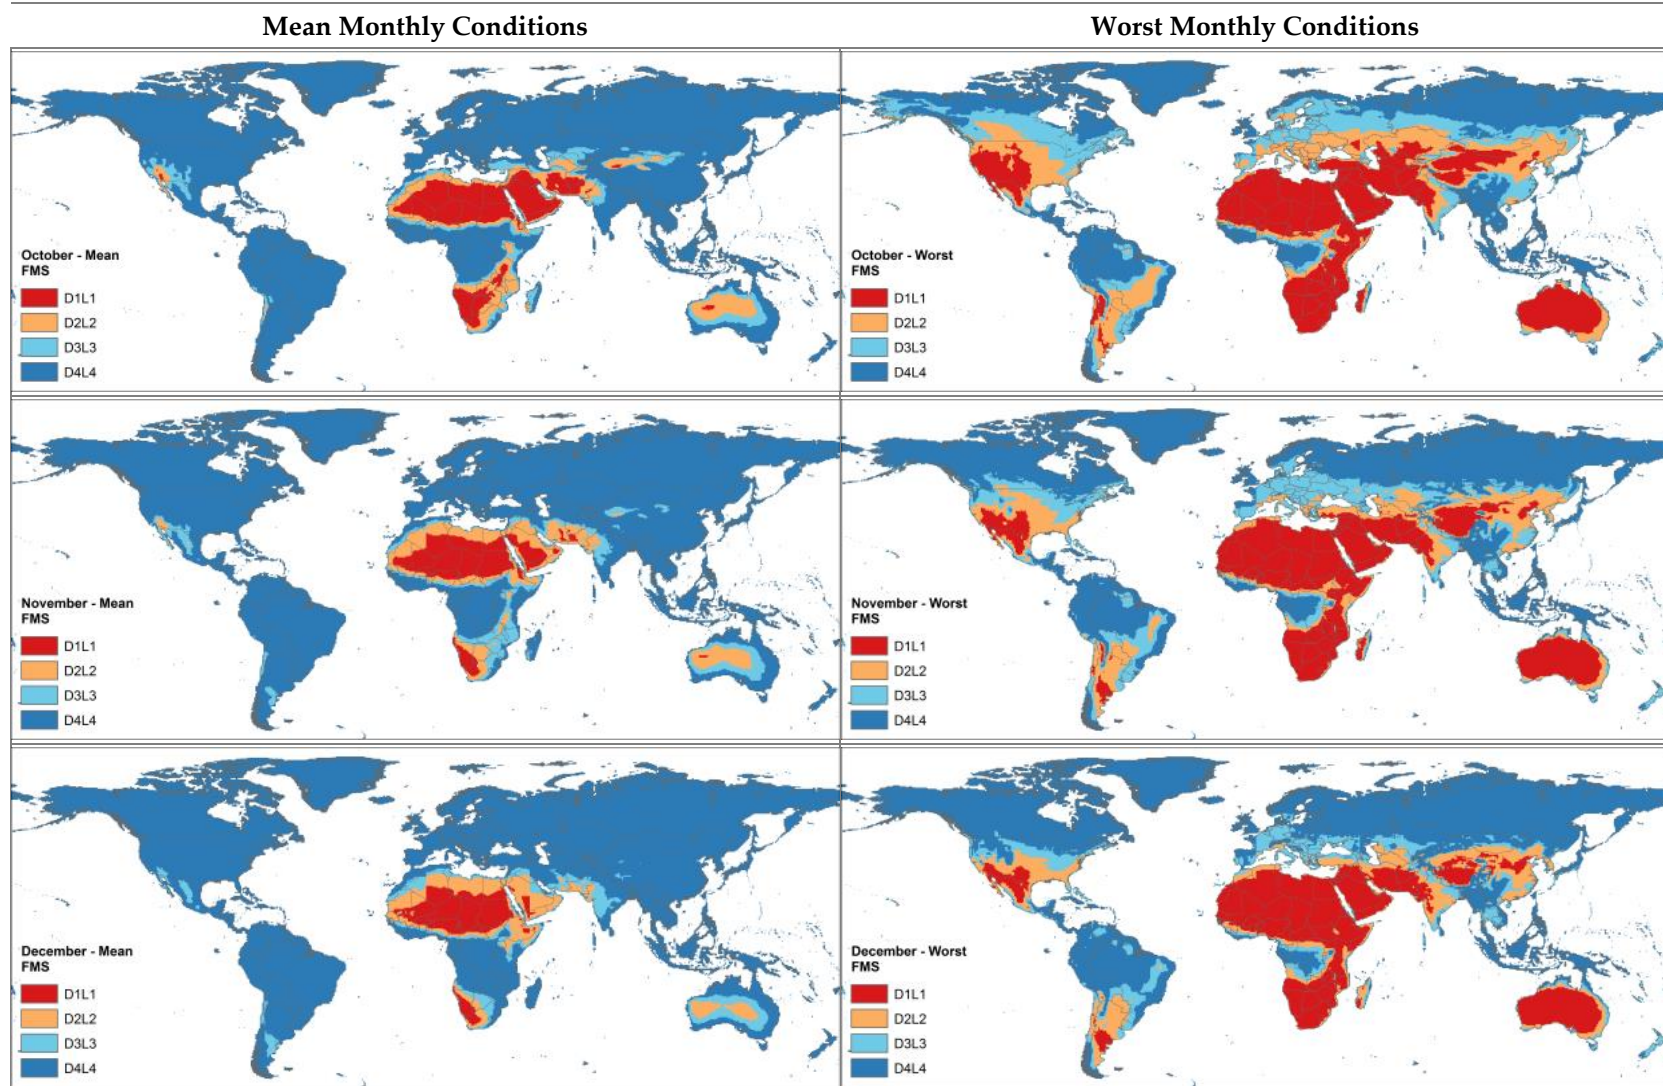



Table S2: Monthly Wind Classes

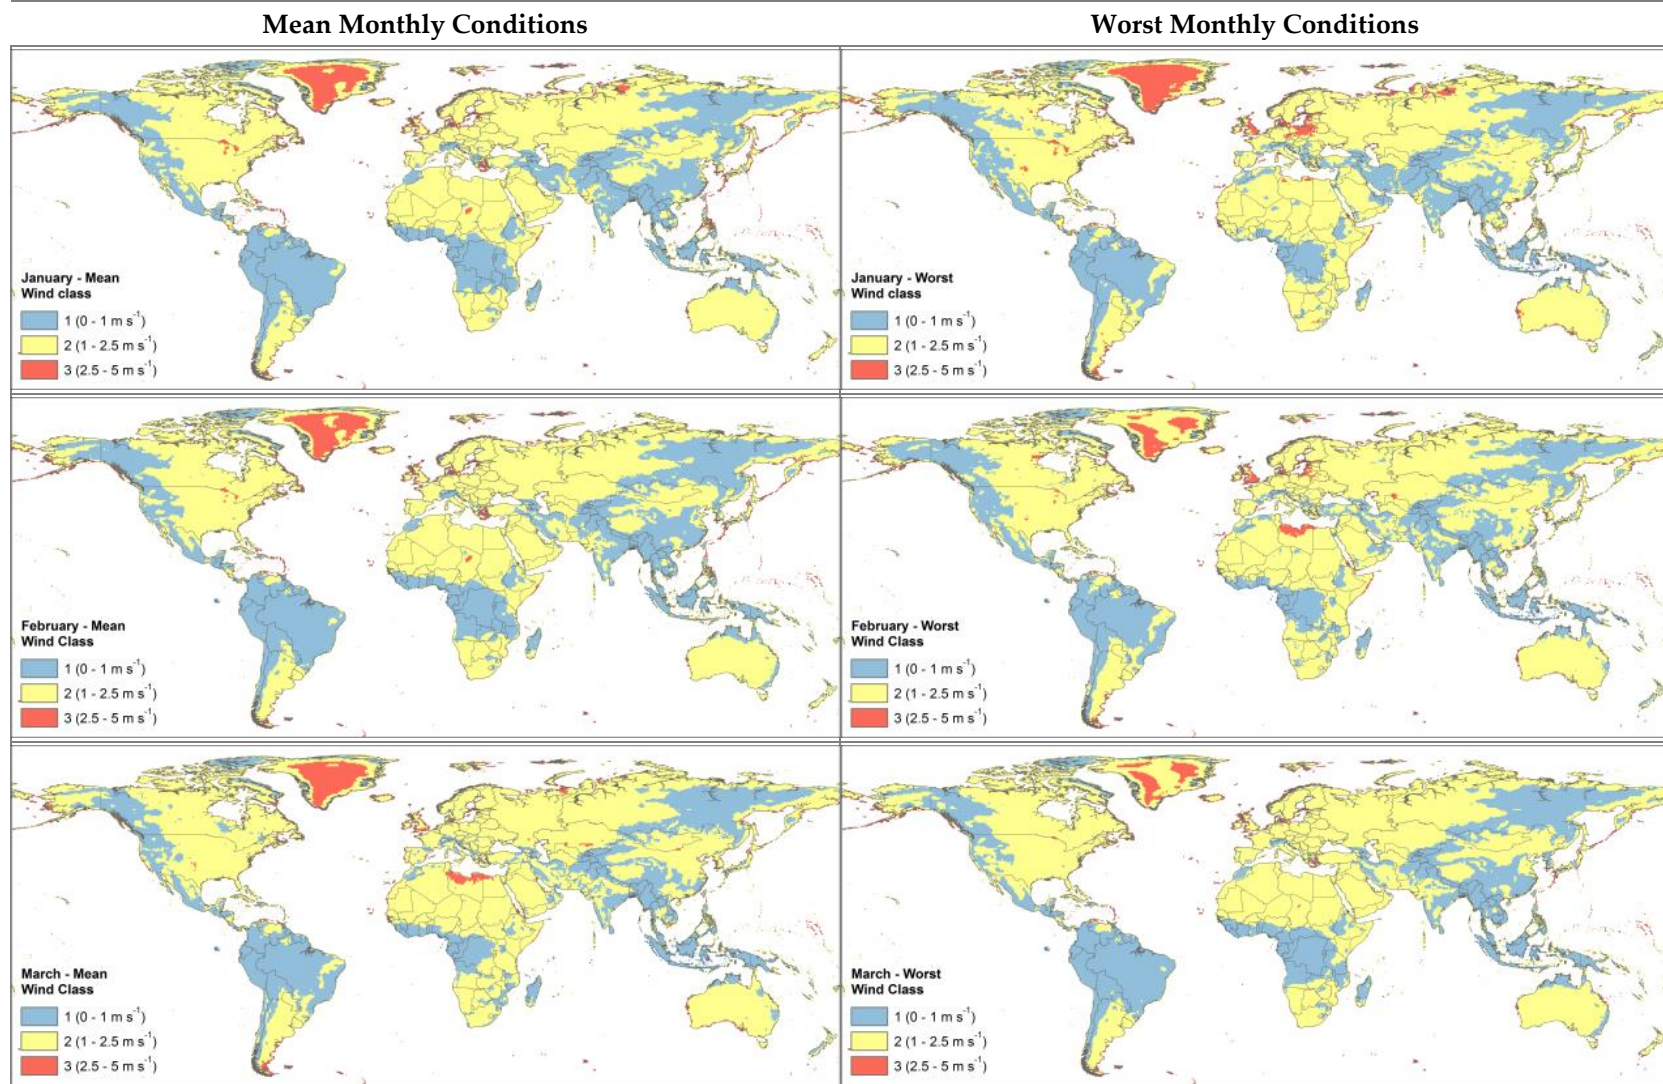

Table S2: Monthly Wind Classes

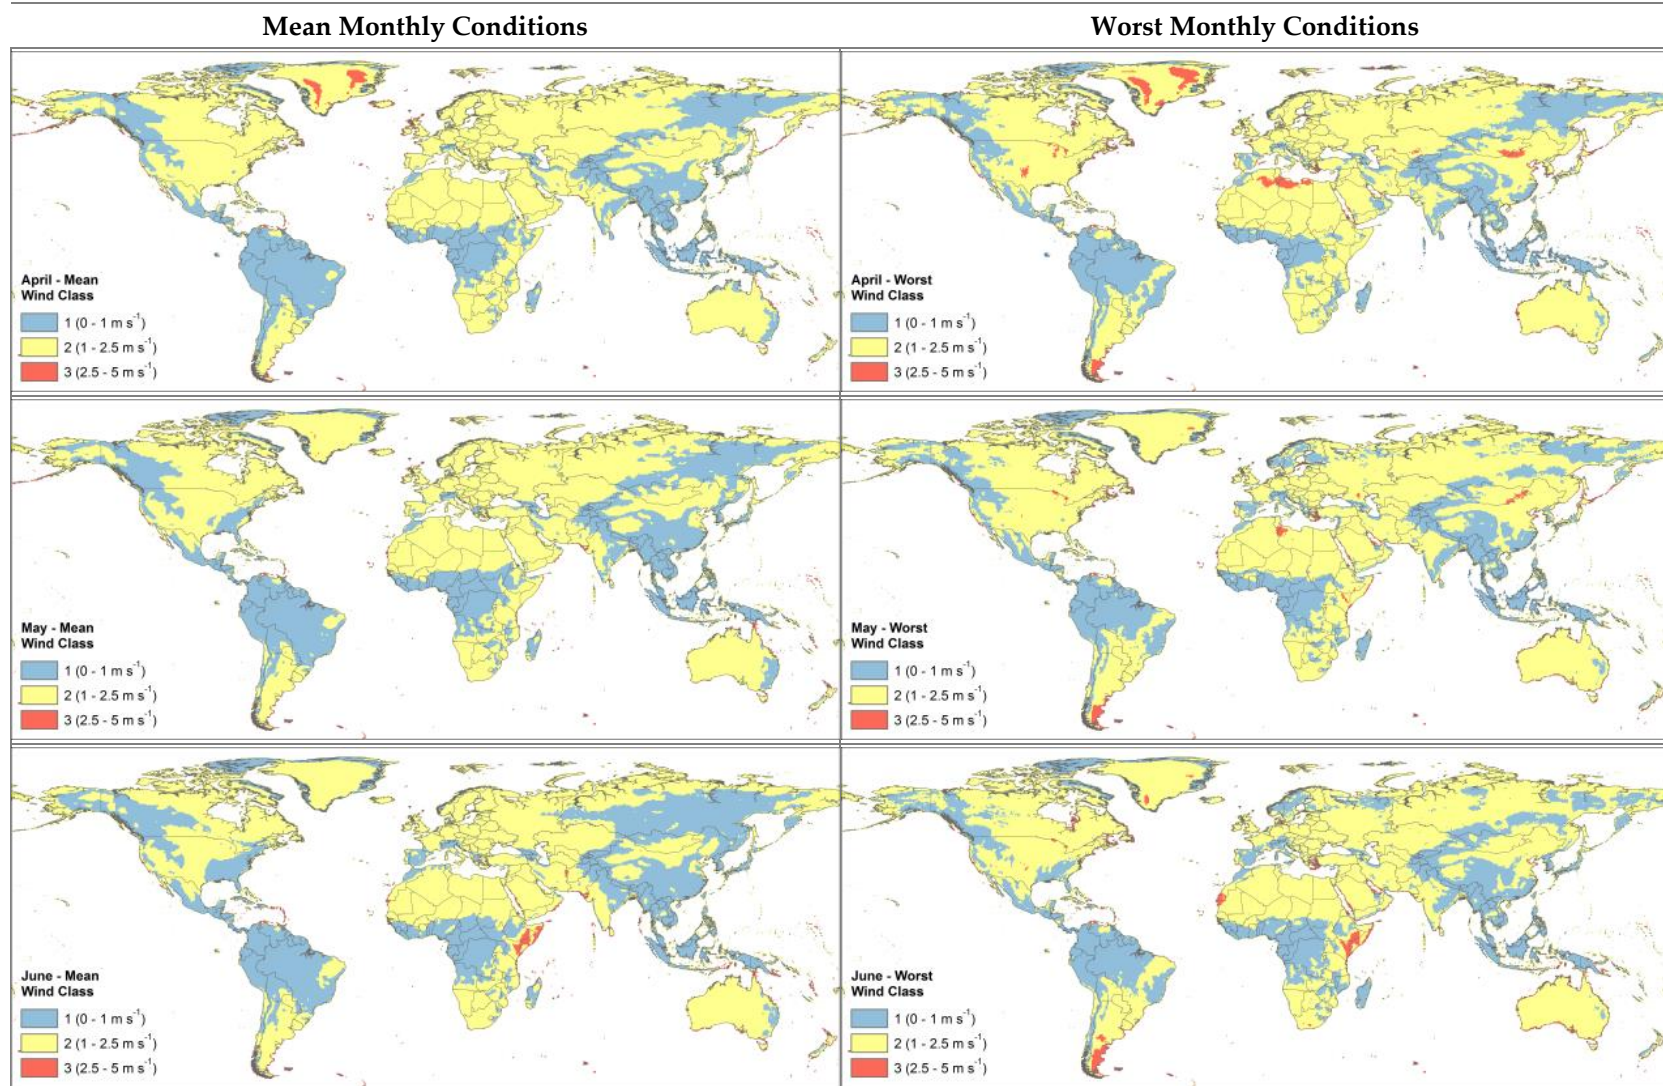



Table S2: Monthly Wind Classes

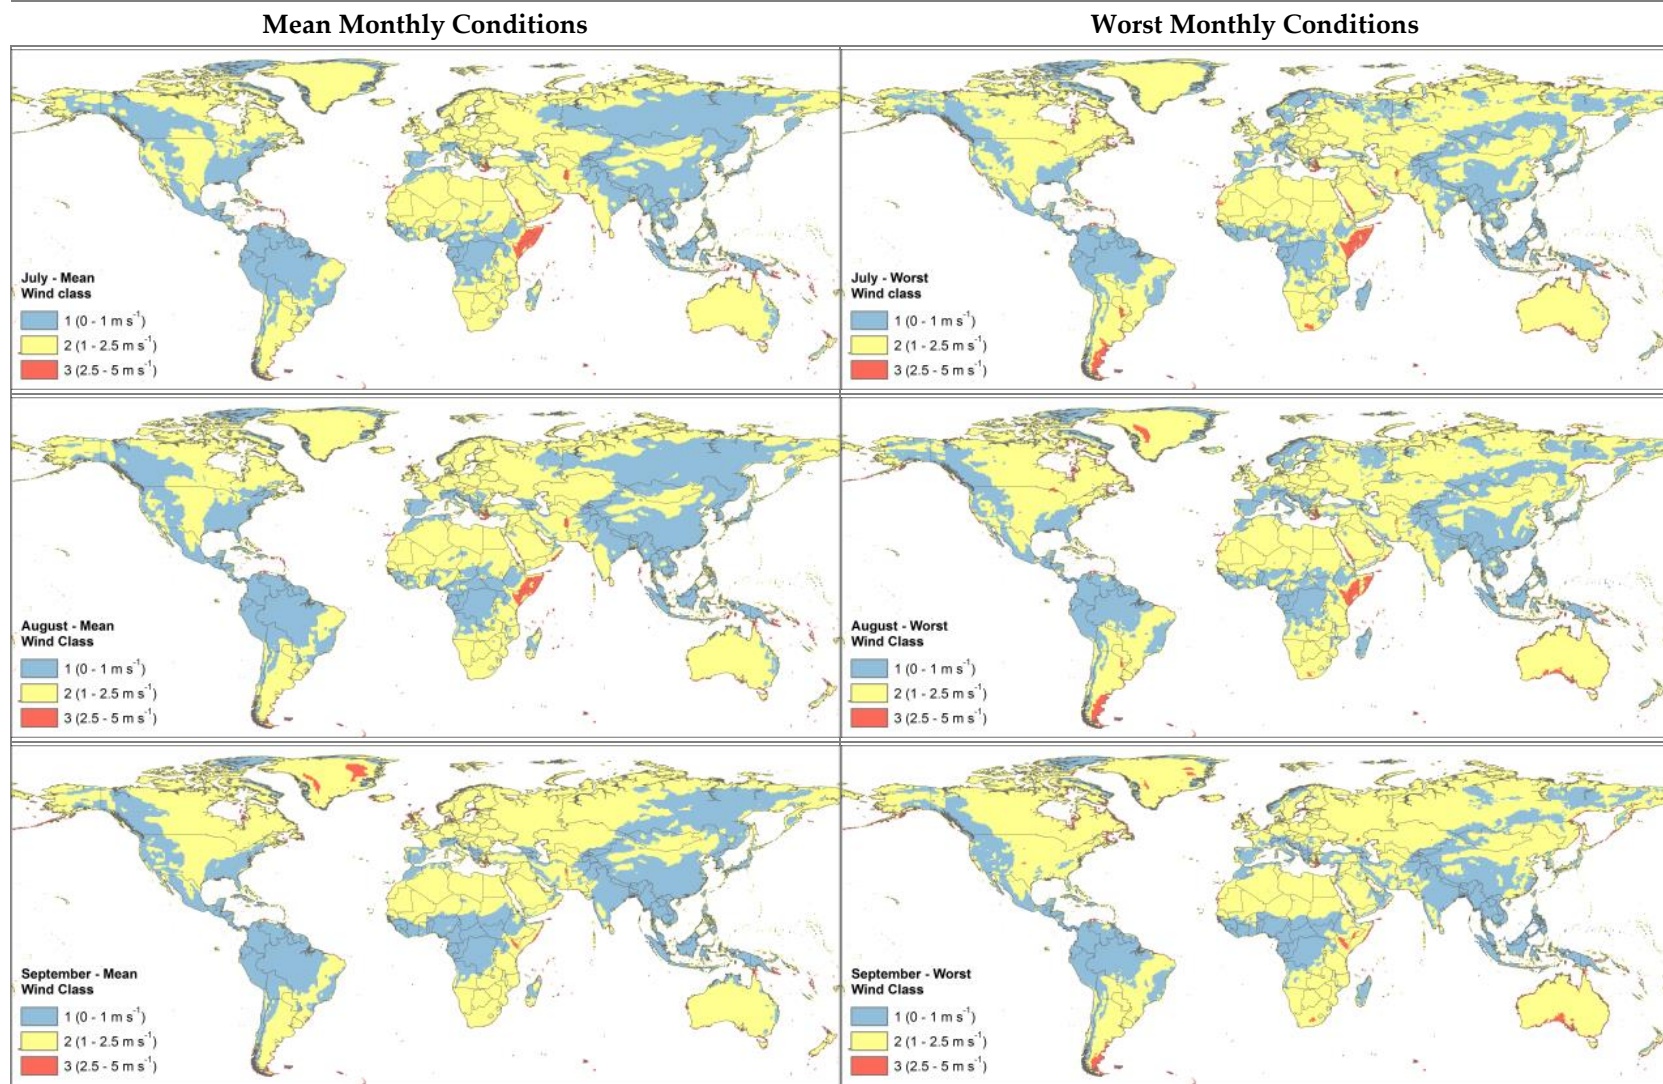

Table S2: Monthly Wind Classes

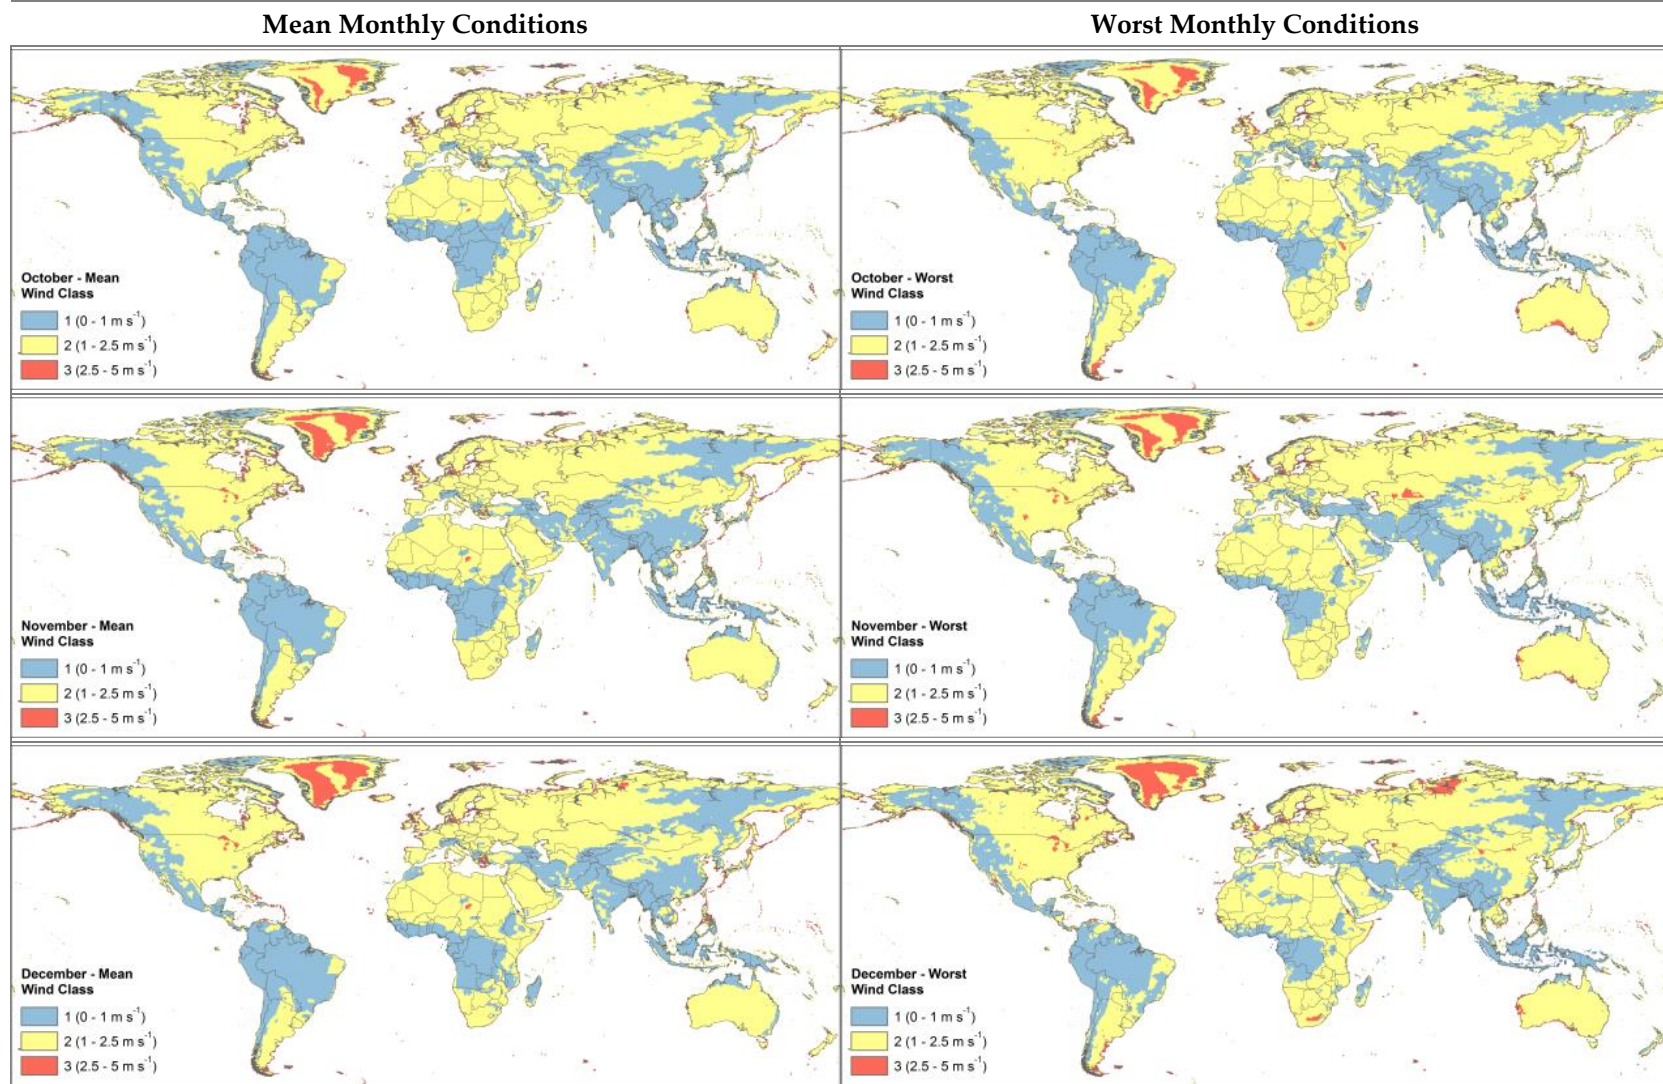



Table S3: Monthly Reaction Intensity

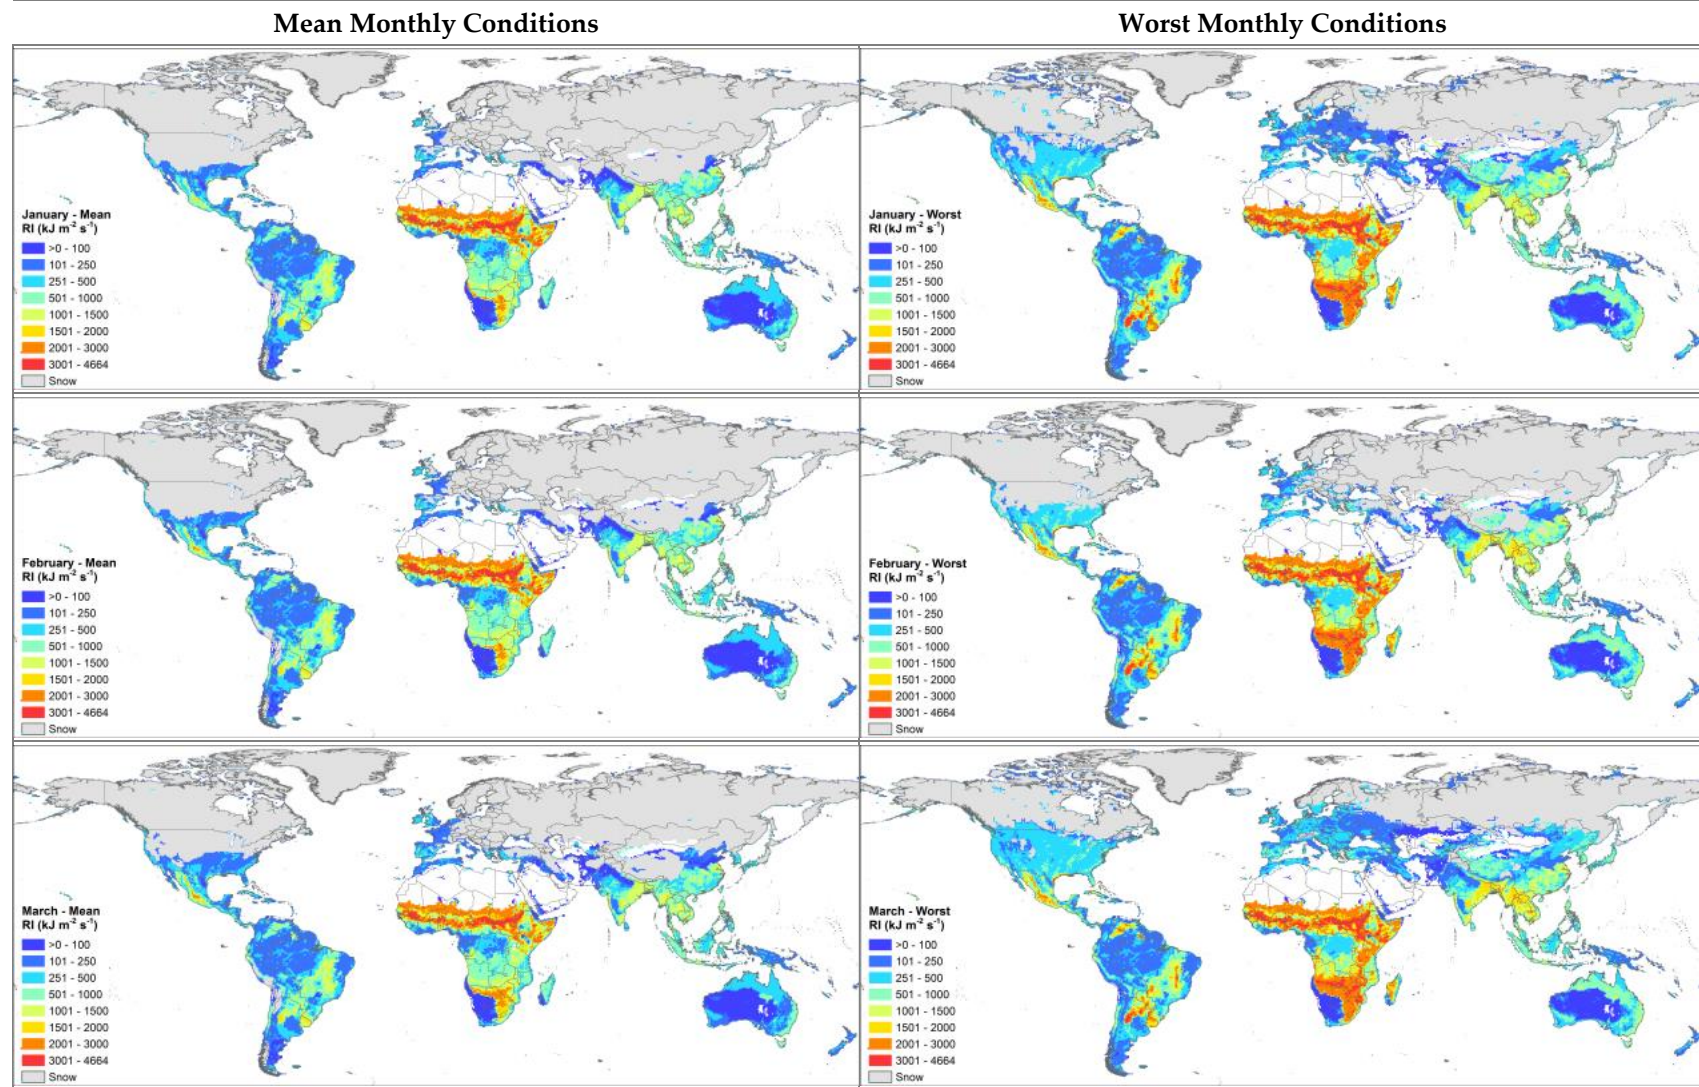

Table S3: Monthly Reaction Intensity

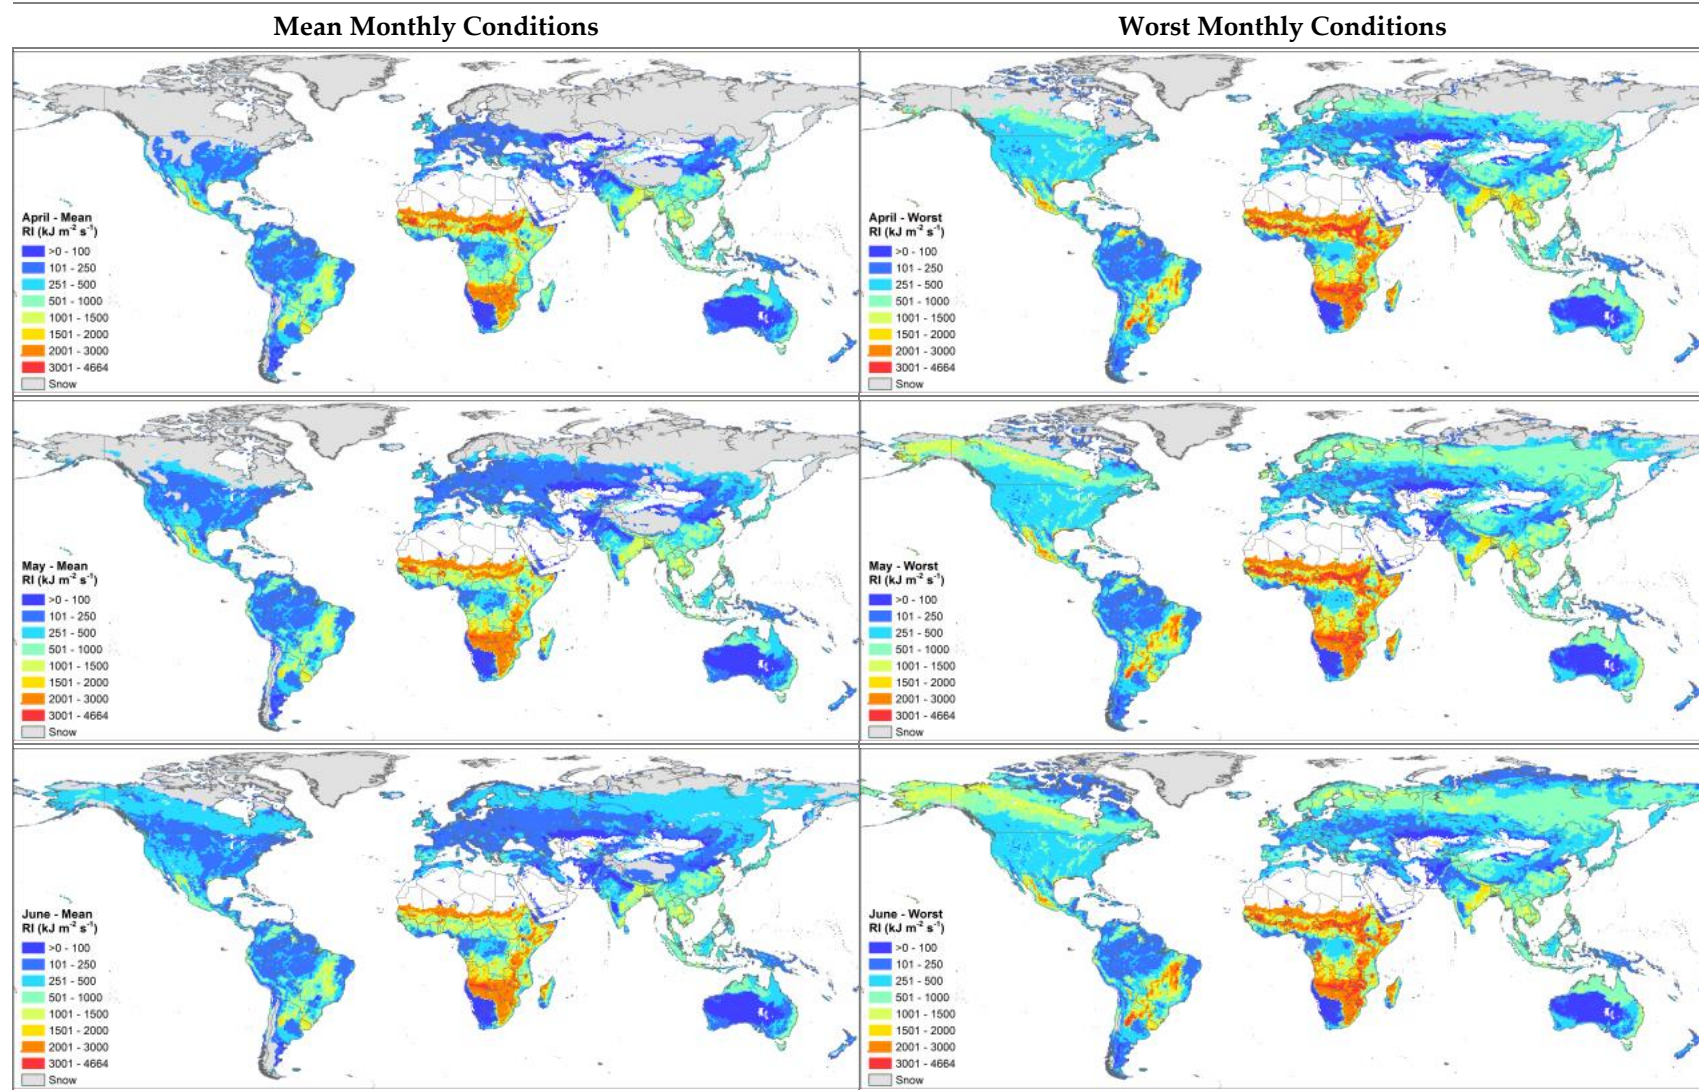



Table S3: Monthly Reaction Intensity

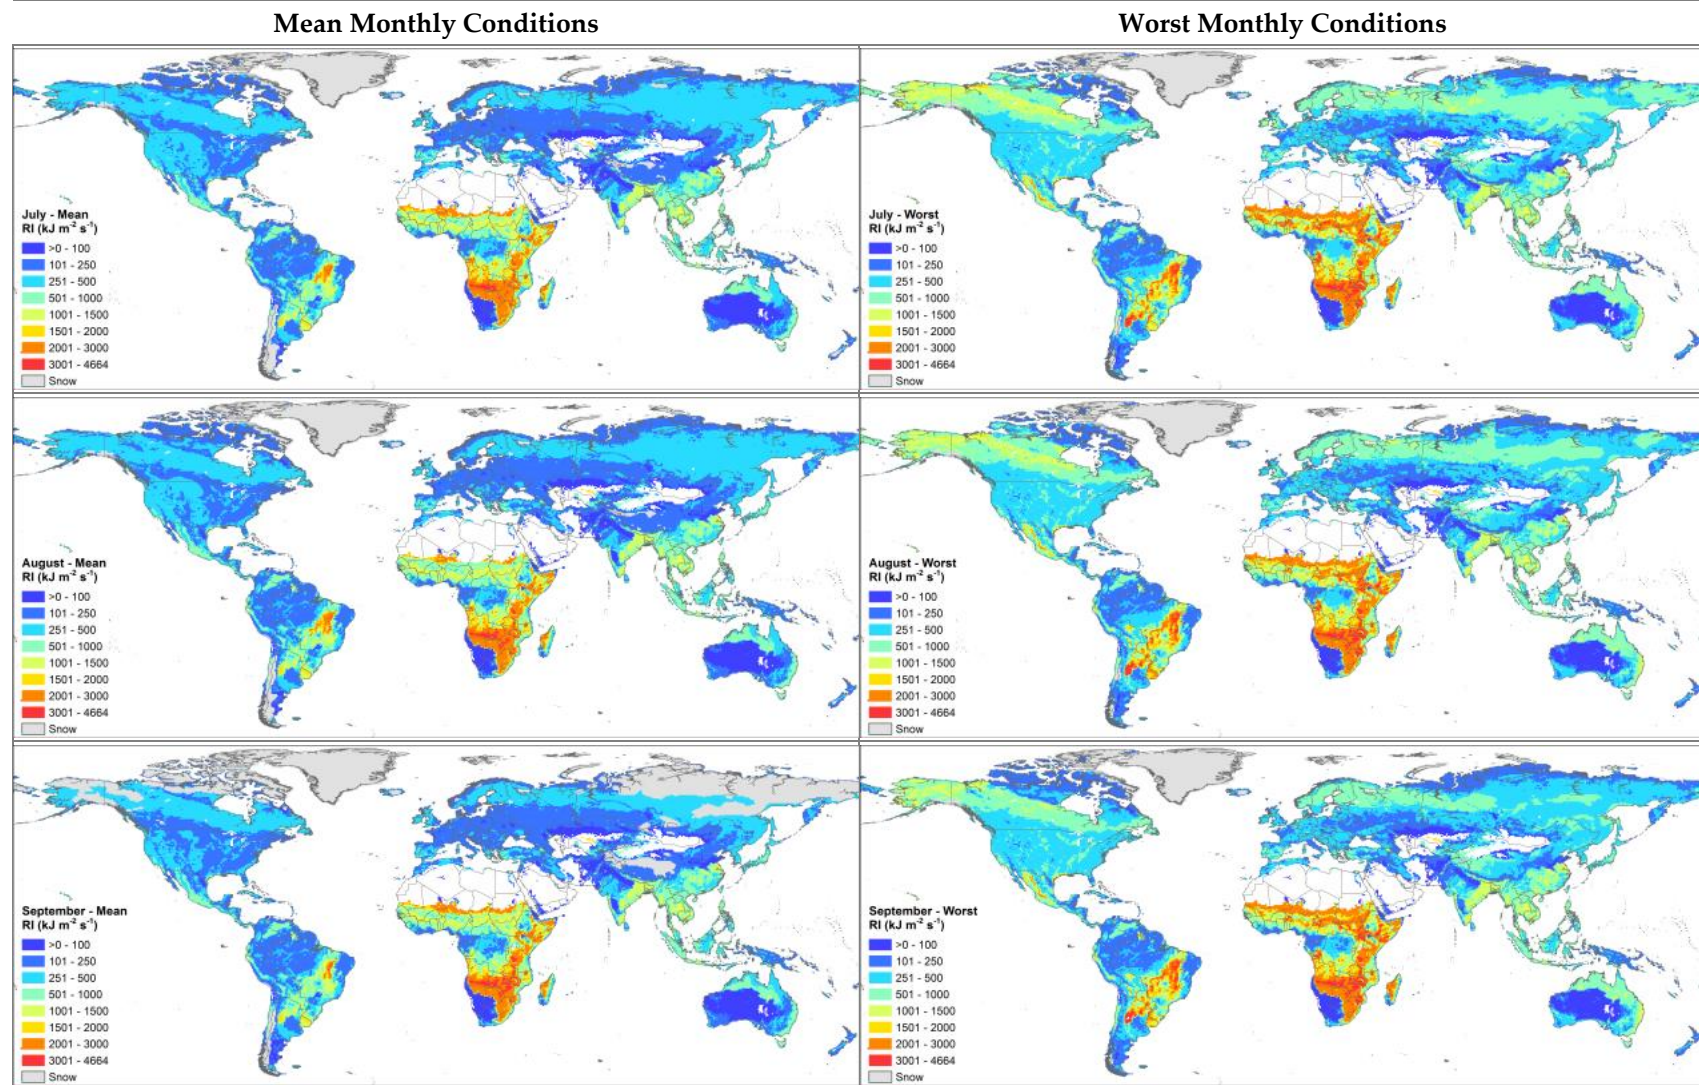

Table S3: Monthly Reaction Intensity

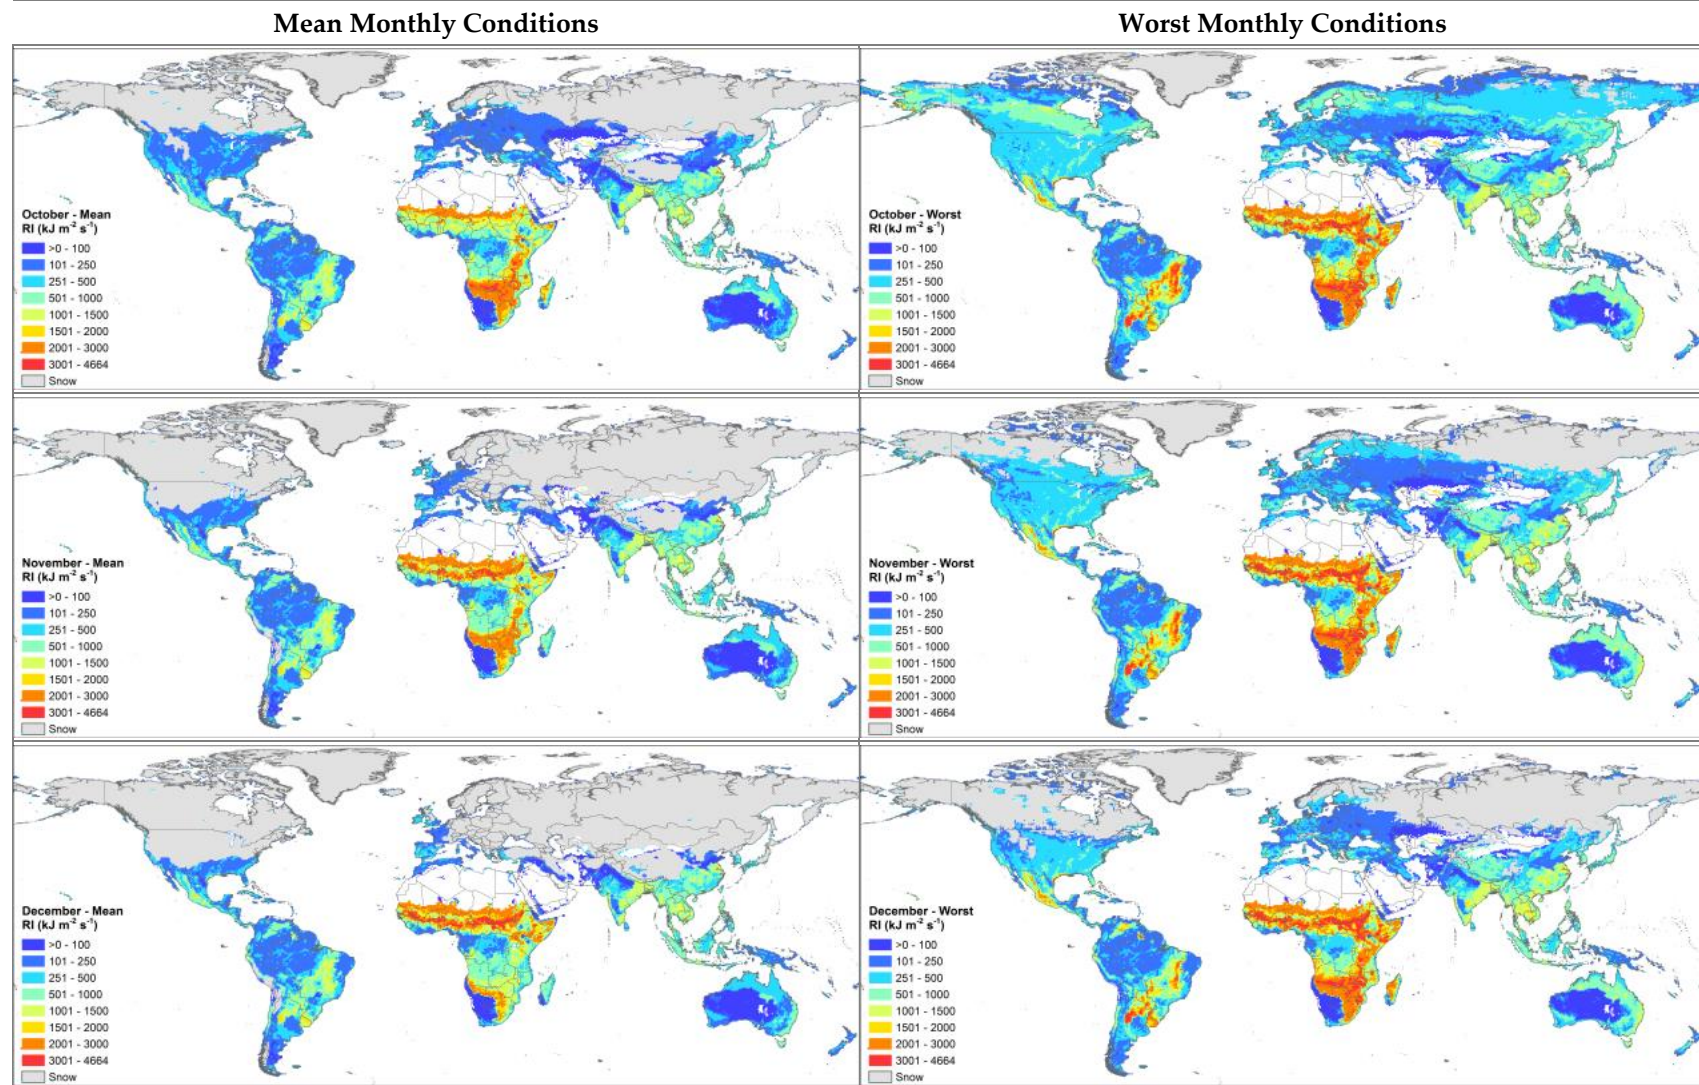



Table S4: Monthly Rate of Spread

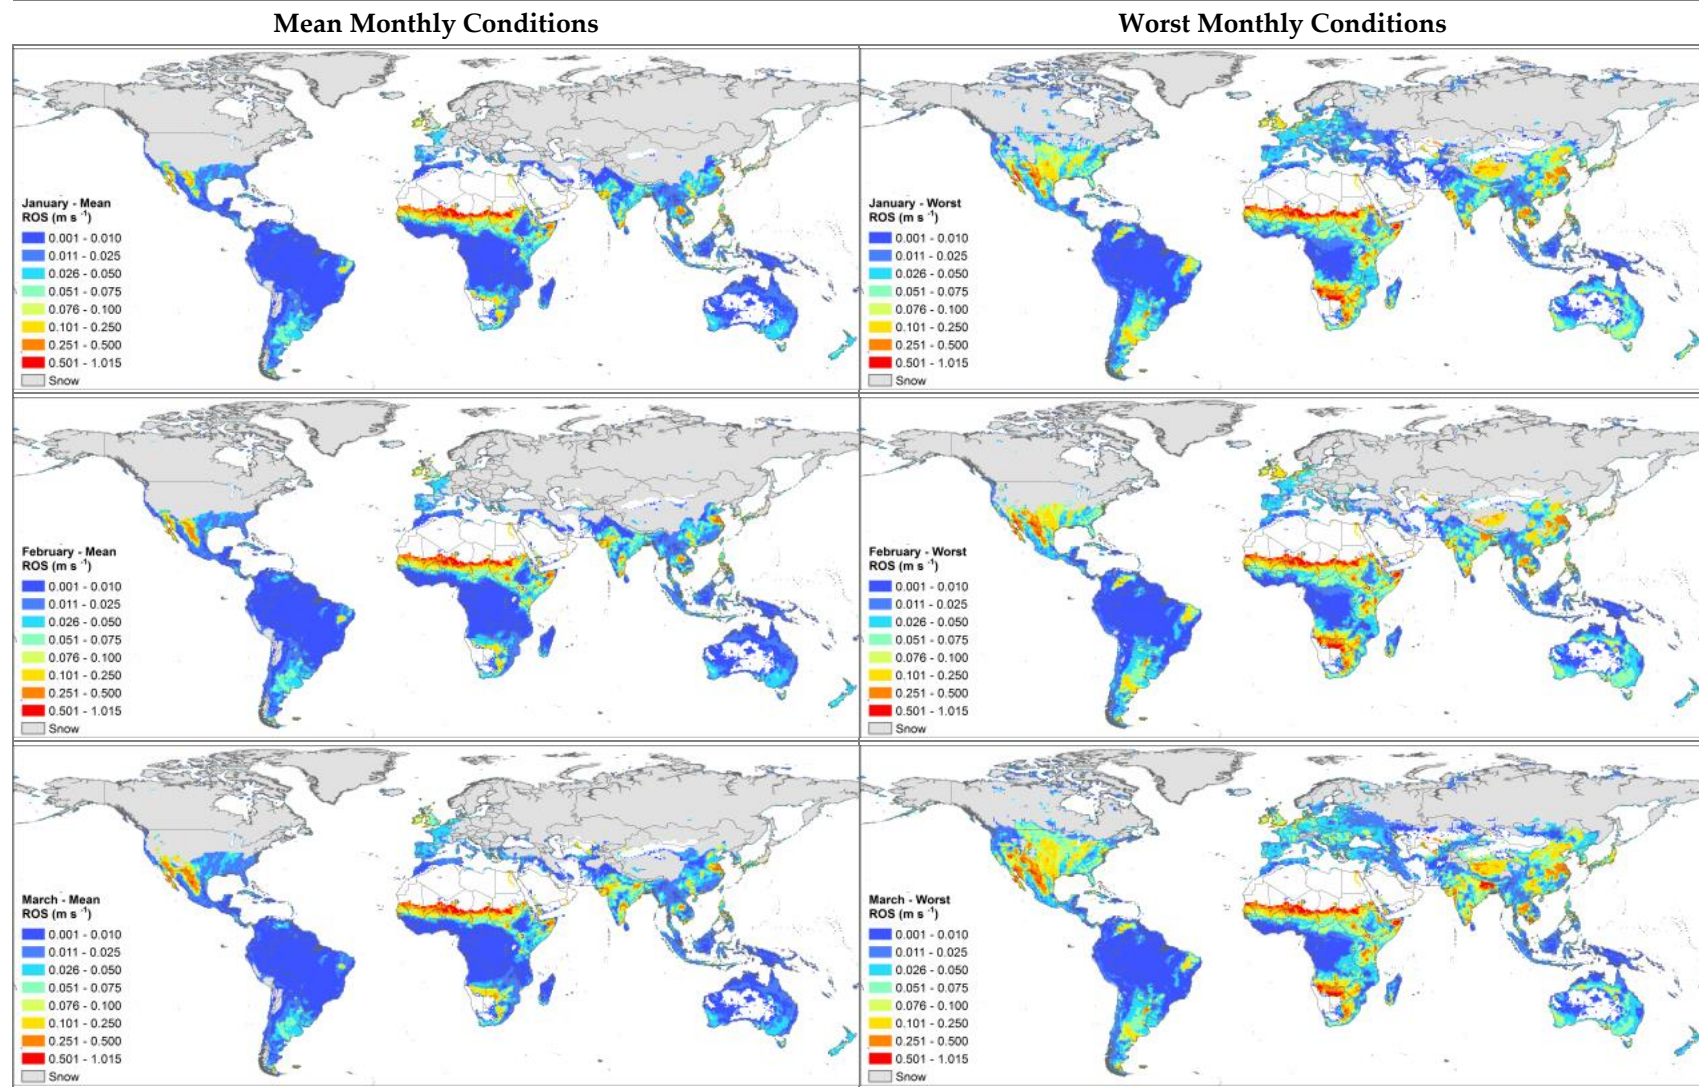

Table S4: Monthly Rate of Spread

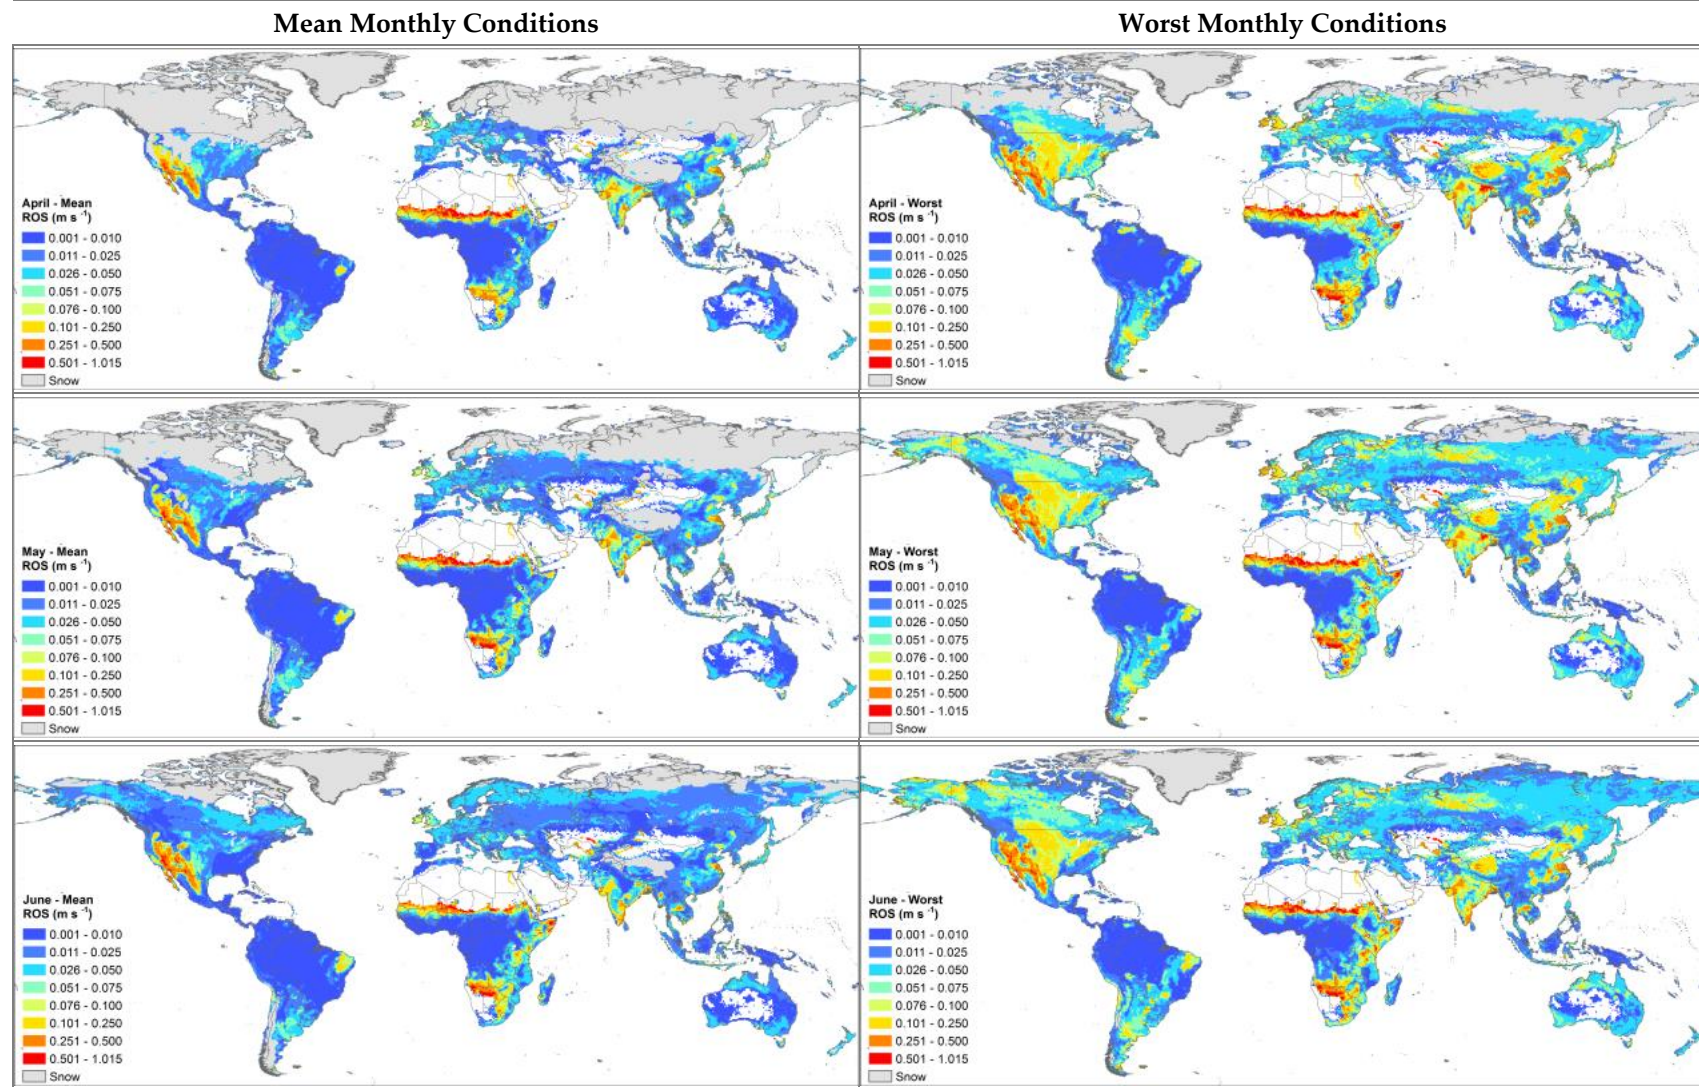



Table S4: Monthly Rate of Spread

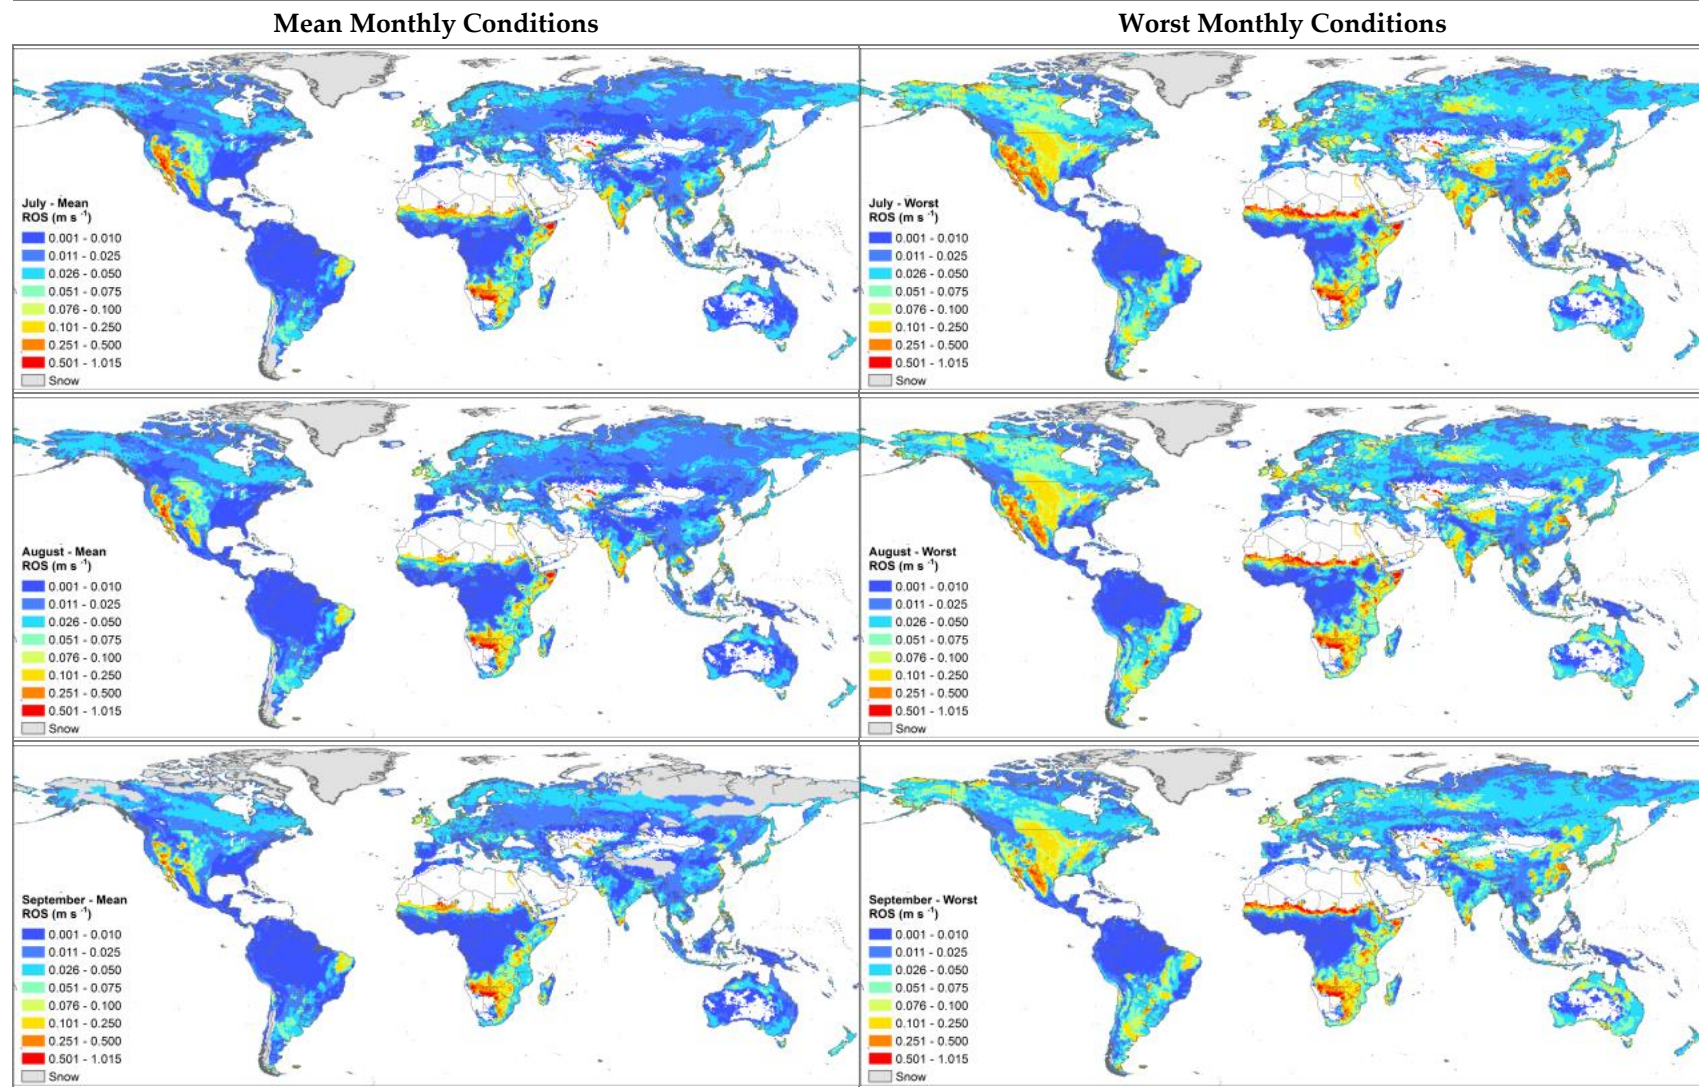

Table S4: Monthly Rate of Spread

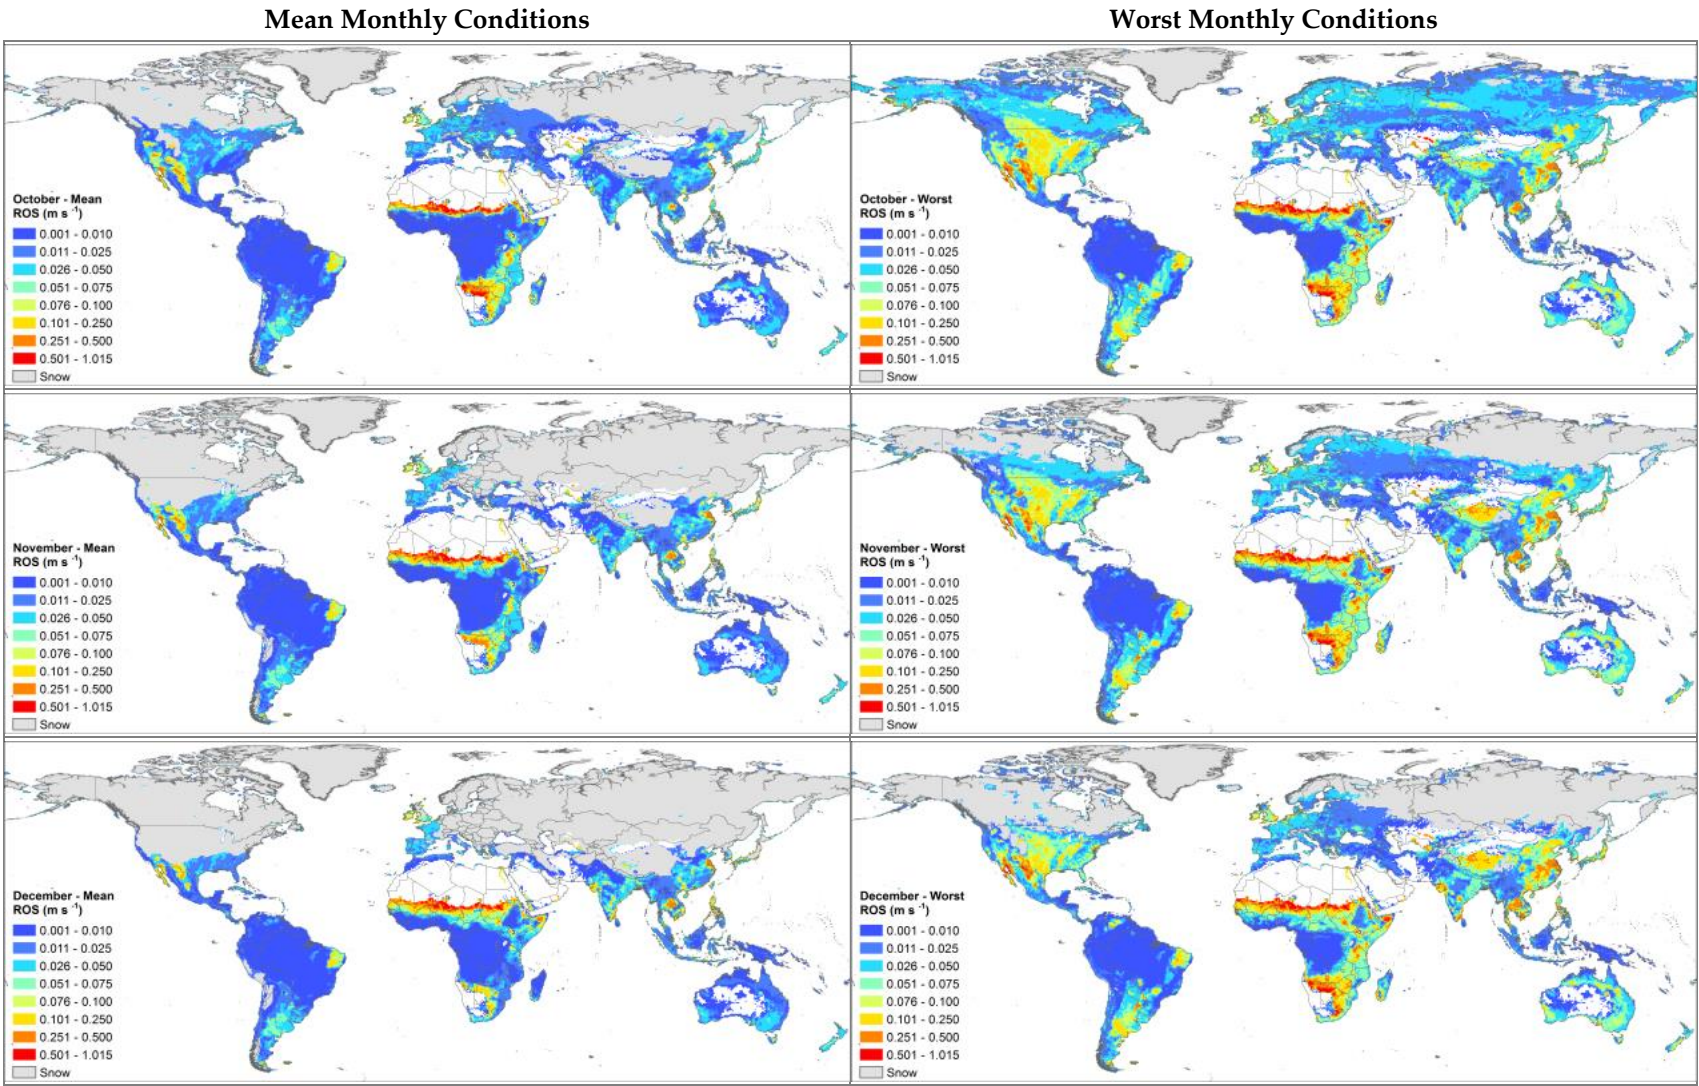



Table S5: Monthly Flame Length

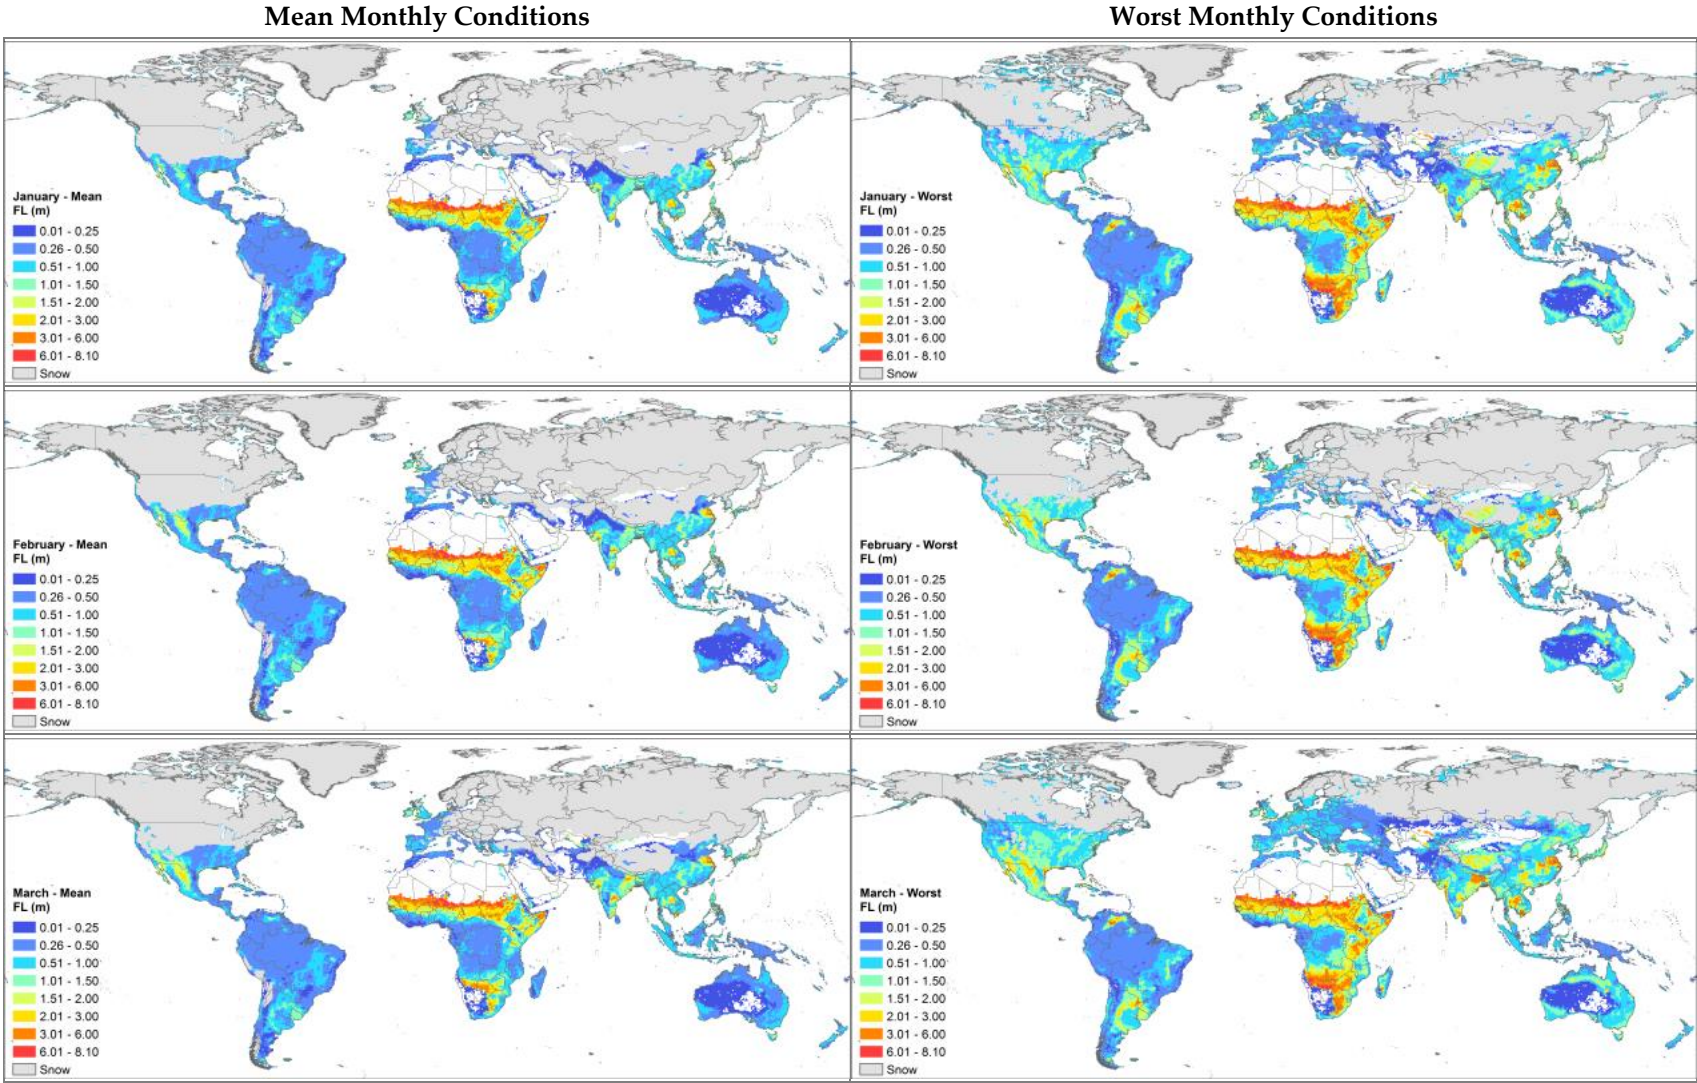

Table S5: Monthly Flame Length

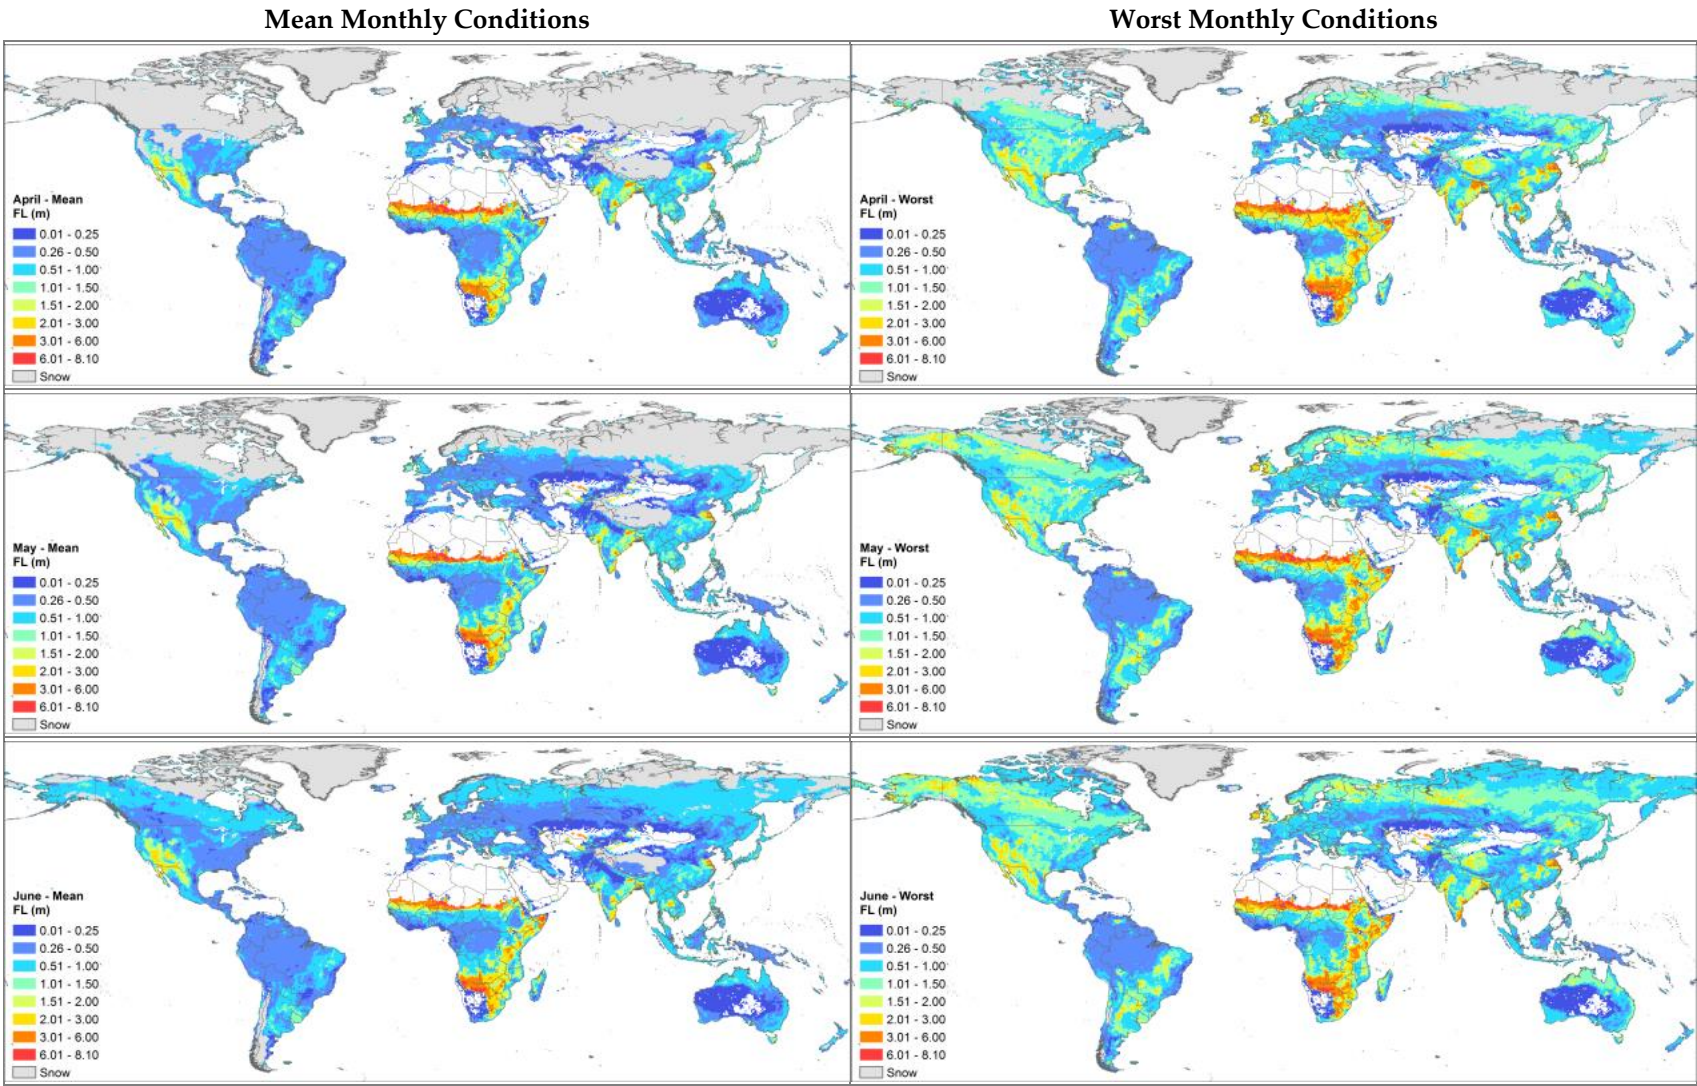



Table S5: Monthly Flame Length

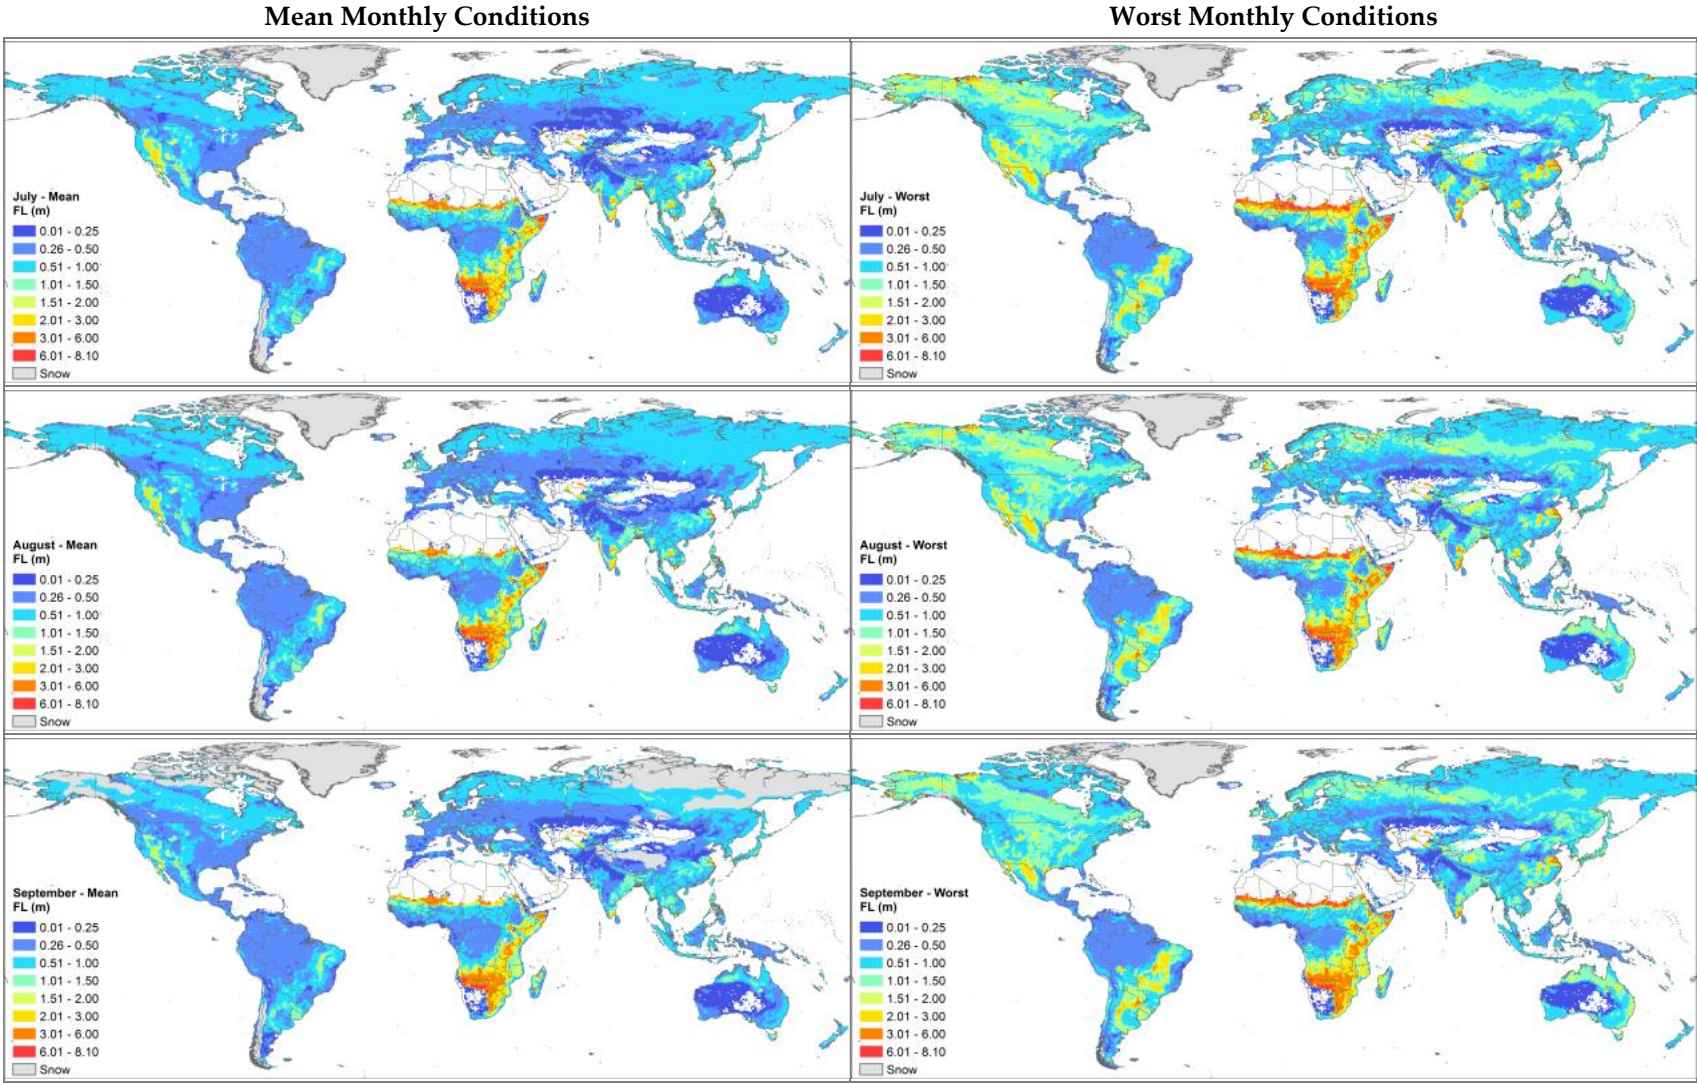

Table S5: Monthly Flame Length

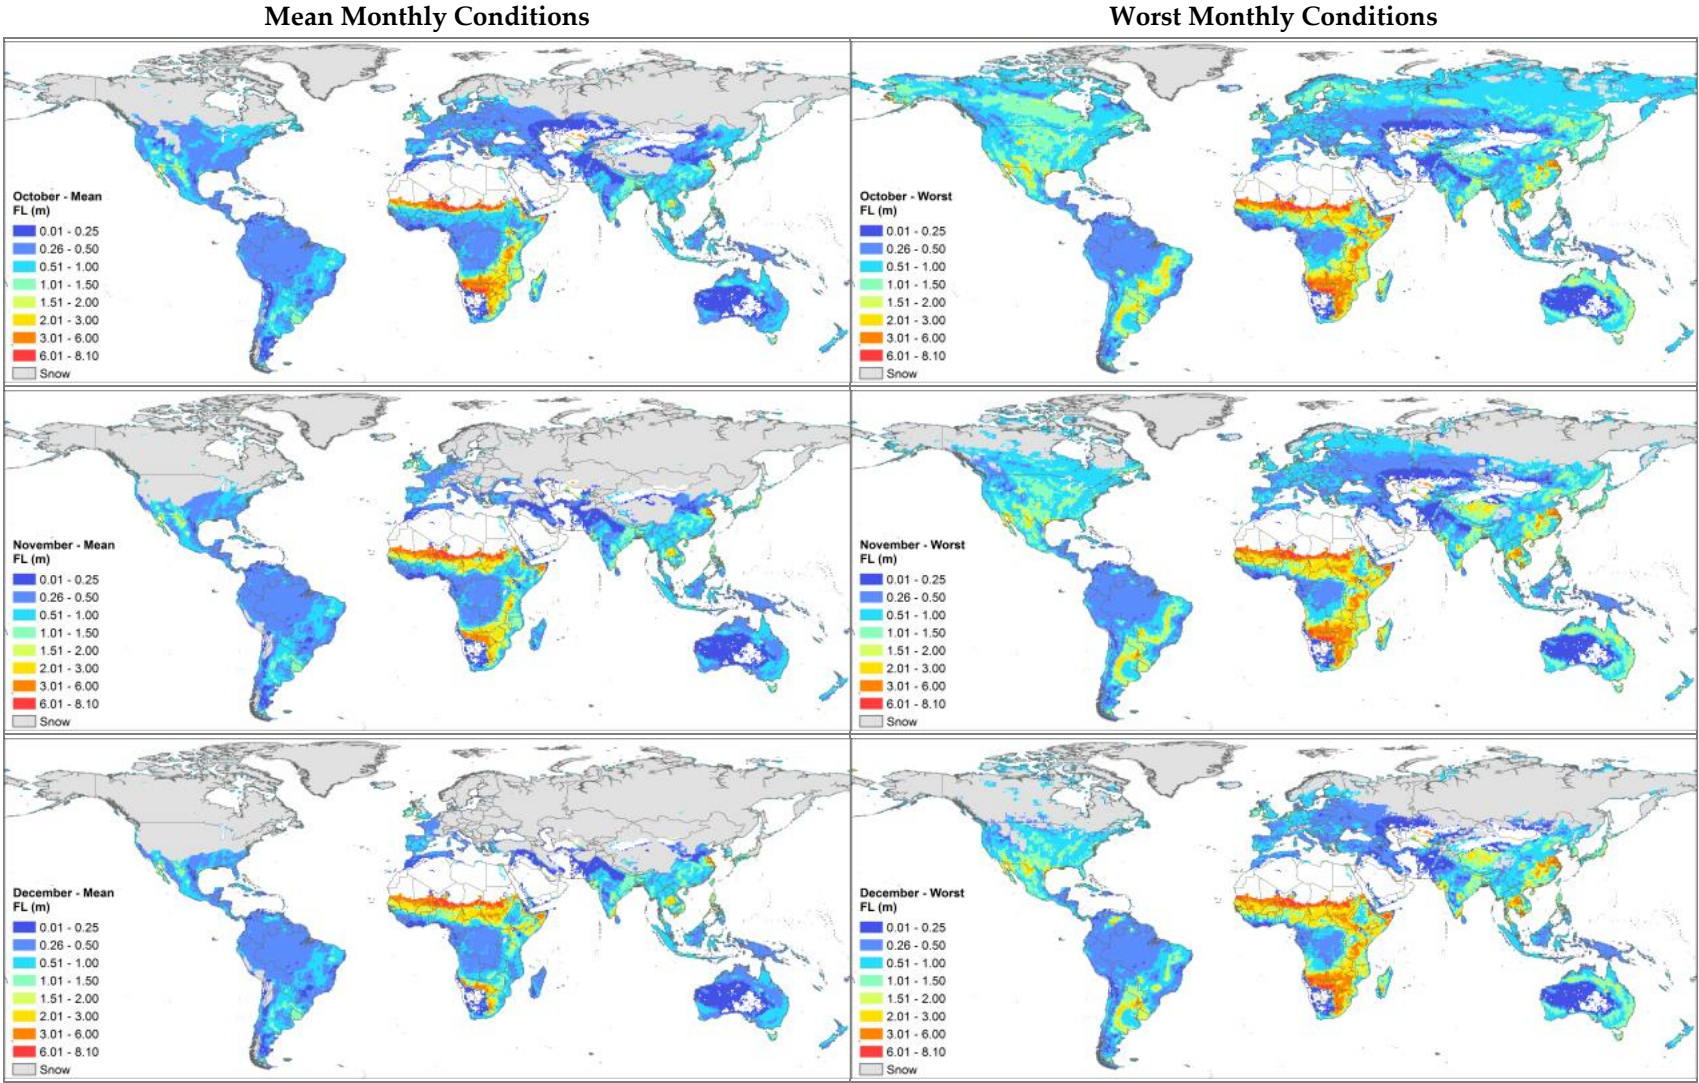

Supplement: s1 [file s1]
